# Supplementary material for: Exploring the anion chemical space of Ln 2 OF 2−x Cl x H 2 (Ln = Y, La, Gd): a model of electroelastic material with high mechanical sensitivity and energy harvesting
Source: Royal Society of Chemistry journal article supplement (doi:10.1039/d0mh01524e), 2020-11-17
Supplement: d0mh01524e1.pdf [file d0mh01524e1.pdf]

**Electronic supplementary information for:**

**Exploring The Anion Chemical Space of  $\text{Ln}_2\text{OF}_{2-x}\text{Cl}_x\text{H}_2$   
(Ln = Y, La, Gd): An Electroelastic Material with  
High Mechanical Sensitivity and Energy Harvesting**

Evgenii Strugovshchikov\* and Aleksandr Pishtshev

*Institute of Physics, University of Tartu, W.Ostwaldi 1, 50411 Tartu, Estonia*

E-mail: [evgenii.strugovshchikov@ut.ee](mailto:evgenii.strugovshchikov@ut.ee), [aleksandr.pishtshev@ut.ee](mailto:aleksandr.pishtshev@ut.ee)

**CONTENTS**

|                                                                                                                        |     |
|------------------------------------------------------------------------------------------------------------------------|-----|
| 1. Equilibrium atomic positions predicted for $\text{Ln}_2\text{OF}_{2-x}\text{Cl}_x\text{H}_2$ (Ln = Y, La, Gd) ..... | S2  |
| 2. Bond distances and bond angles in $\text{Ln}_2\text{OF}_{2-x}\text{Cl}_x\text{H}_2$ (Ln = Y, La, Gd).....           | S6  |
| 3. Elastic properties of $\text{Ln}_2\text{OF}_{2-x}\text{Cl}_x\text{H}_2$ (Ln = Y, La, Gd) .....                      | S9  |
| 4. Zone-centered optical vibrational modes calculated in the harmonic approximation.....                               | S12 |
| 5. Simulation of X-ray diffraction patterns.....                                                                       | S18 |
| 6. Radial distribution function evaluated for the shortest interatomic distances .....                                 | S22 |
| 7. Piezoelectric properties of $\text{Ln}_2\text{OF}_{2-x}\text{Cl}_x\text{H}_2$ (Ln = Y, La, Gd).....                 | S23 |
| References:.....                                                                                                       | S25 |

1. Equilibrium atomic positions predicted for  $\text{Ln}_2\text{OF}_{2-x}\text{Cl}_x\text{H}_2$  (Ln = Y, La, Gd)

Supplementary Table S1:  $\text{Y}_2\text{OF}_2\text{H}_2$ , P3m1

| P3m1 (156); a = 3.712 Å, c = 6.941 Å |                  |       |        |        |        |
|--------------------------------------|------------------|-------|--------|--------|--------|
| Atom                                 | Wyckoff position | Symm. | x      | y      | z      |
| Y1                                   | 1a               | 3m.   | 0.0000 | 0.0000 | 0.6421 |
| Y2                                   | 1c               | 3m.   | 0.6667 | 0.3333 | 0.2102 |
| O1                                   | 1c               | 3m.   | 0.6667 | 0.3333 | 0.5306 |
| F1                                   | 1a               | 3m.   | 0.0000 | 0.0000 | 0.0000 |
| F2                                   | 1b               | 3m.   | 0.3333 | 0.6667 | 0.7721 |
| H1                                   | 1a               | 3m.   | 0.0000 | 0.0000 | 0.3294 |
| H2                                   | 1b               | 3m.   | 0.3333 | 0.6667 | 0.2326 |

Supplementary Table S2:  $\text{Y}_2\text{OF}_2\text{H}_2$ , R3m

| R3m (160); a = 3.657 Å, c = 22.014 Å |                  |       |        |        |        |
|--------------------------------------|------------------|-------|--------|--------|--------|
| Atom                                 | Wyckoff position | Symm. | x      | y      | z      |
| Y1                                   | 3a               | 3m    | 0.0000 | 0.0000 | 0.0000 |
| Y2                                   | 3a               | 3m    | 0.0000 | 0.0000 | 0.4710 |
| O1                                   | 3a               | 3m    | 0.0000 | 0.0000 | 0.3659 |
| F1                                   | 3a               | 3m    | 0.0000 | 0.0000 | 0.1964 |
| F2                                   | 3a               | 3m    | 0.0000 | 0.0000 | 0.6168 |
| H1                                   | 3a               | 3m    | 0.0000 | 0.0000 | 0.7927 |
| H2                                   | 3a               | 3m    | 0.0000 | 0.0000 | 0.0949 |

Supplementary Table S3:  $\text{La}_2\text{OF}_2\text{H}_2$ , P3m1

| P3m1 (156); a = 3.997 Å, c = 7.288 Å |                  |       |        |        |        |
|--------------------------------------|------------------|-------|--------|--------|--------|
| Atom                                 | Wyckoff position | Symm. | x      | y      | z      |
| La1                                  | 1a               | 3m.   | 0.0000 | 0.0000 | 0.6430 |
| La2                                  | 1b               | 3m.   | 0.3333 | 0.6667 | 0.2028 |
| O1                                   | 1b               | 3m.   | 0.3333 | 0.6667 | 0.5279 |
| F1                                   | 1a               | 3m.   | 0.0000 | 0.0000 | 0.0000 |
| F2                                   | 1c               | 3m.   | 0.6667 | 0.3333 | 0.7740 |
| H1                                   | 1a               | 3m.   | 0.0000 | 0.0000 | 0.3250 |
| H2                                   | 1c               | 3m.   | 0.6667 | 0.3333 | 0.2464 |

Supplementary Table S4:  $\text{La}_2\text{OF}_2\text{H}_2$ , R3m

| R3m (160); a = 3.978 Å, c = 21.444 Å |                  |       |        |        |        |
|--------------------------------------|------------------|-------|--------|--------|--------|
| Atom                                 | Wyckoff position | Symm. | x      | y      | z      |
| La1                                  | 3a               | 3m    | 0.0000 | 0.0000 | 0.0000 |
| La2                                  | 3a               | 3m    | 0.0000 | 0.0000 | 0.4847 |
| O1                                   | 3a               | 3m    | 0.0000 | 0.0000 | 0.3705 |
| F1                                   | 3a               | 3m    | 0.0000 | 0.0000 | 0.2130 |
| F2                                   | 3a               | 3m    | 0.0000 | 0.0000 | 0.6163 |
| H1                                   | 3a               | 3m    | 0.0000 | 0.0000 | 0.8035 |
| H2                                   | 3a               | 3m    | 0.0000 | 0.0000 | 0.1046 |

**Supplementary Table S5: Gd<sub>2</sub>OF<sub>2</sub>H<sub>2</sub>, P3m1**

| <b>P3m1 (156); a = 3.783 Å, c = 7.026 Å</b> |                  |       |        |        |        |
|---------------------------------------------|------------------|-------|--------|--------|--------|
| Atom                                        | Wyckoff position | Symm. | x      | y      | z      |
| Gd1                                         | 1a               | 3m.   | 0.0000 | 0.0000 | 0.6414 |
| Gd2                                         | 1c               | 3m.   | 0.6667 | 0.3333 | 0.2079 |
| O1                                          | 1c               | 3m.   | 0.6667 | 0.3333 | 0.5287 |
| F1                                          | 1a               | 3m.   | 0.0000 | 0.0000 | 0.0000 |
| F2                                          | 1b               | 3m.   | 0.3333 | 0.6667 | 0.7722 |
| H1                                          | 1a               | 3m.   | 0.0000 | 0.0000 | 0.3289 |
| H2                                          | 1b               | 3m.   | 0.3333 | 0.6667 | 0.2338 |

**Supplementary Table S6: Gd<sub>2</sub>OF<sub>2</sub>H<sub>2</sub>, R3m**

| <b>R3m (160); a = 3.742 Å, c = 21.562 Å</b> |                  |       |        |        |        |
|---------------------------------------------|------------------|-------|--------|--------|--------|
| Atom                                        | Wyckoff position | Symm. | x      | y      | z      |
| Gd1                                         | 3a               | 3m    | 0.0000 | 0.0000 | 0.0000 |
| Gd2                                         | 3a               | 3m    | 0.0000 | 0.0000 | 0.4760 |
| O1                                          | 3a               | 3m    | 0.0000 | 0.0000 | 0.3676 |
| F1                                          | 3a               | 3m    | 0.0000 | 0.0000 | 0.2024 |
| F2                                          | 3a               | 3m    | 0.0000 | 0.0000 | 0.6159 |
| H1                                          | 3a               | 3m    | 0.0000 | 0.0000 | 0.7972 |
| H2                                          | 3a               | 3m    | 0.0000 | 0.0000 | 0.0981 |

**Supplementary Table S7: Y<sub>2</sub>OFCIH<sub>2</sub>, P3m1**

| <b>P3m1 (156); a = 3.735 Å, c = 8.181 Å</b> |                  |       |        |        |        |
|---------------------------------------------|------------------|-------|--------|--------|--------|
| Atom                                        | Wyckoff position | Symm. | x      | y      | z      |
| Y1                                          | 1a               | 3m.   | 0.0000 | 0.0000 | 0.0000 |
| Y2                                          | 1b               | 3m.   | 0.3333 | 0.6667 | 0.3637 |
| O1                                          | 1b               | 3m.   | 0.3333 | 0.6667 | 0.0891 |
| F1                                          | 1c               | 3m.   | 0.6667 | 0.3333 | 0.8849 |
| Cl1                                         | 1a               | 3m.   | 0.0000 | 0.0000 | 0.5930 |
| H1                                          | 1a               | 3m.   | 0.0000 | 0.0000 | 0.2660 |
| H2                                          | 1c               | 3m.   | 0.6667 | 0.3333 | 0.3393 |

**Supplementary Table S8: Y<sub>2</sub>OFCIH<sub>2</sub>, R3m**

| <b>R3m (160); a = 3.712 Å, c = 25.933 Å</b> |                  |       |        |        |        |
|---------------------------------------------|------------------|-------|--------|--------|--------|
| Atom                                        | Wyckoff position | Symm. | x      | y      | z      |
| Y1                                          | 3a               | 3m    | 0.0000 | 0.0000 | 0.0000 |
| Y2                                          | 3a               | 3m    | 0.0000 | 0.0000 | 0.4484 |
| O1                                          | 3a               | 3m    | 0.0000 | 0.0000 | 0.3604 |
| F1                                          | 3a               | 3m    | 0.0000 | 0.0000 | 0.6270 |
| Cl1                                         | 3a               | 3m    | 0.0000 | 0.0000 | 0.1863 |
| H1                                          | 3a               | 3m    | 0.0000 | 0.0000 | 0.7724 |
| H2                                          | 3a               | 3m    | 0.0000 | 0.0000 | 0.0829 |

**Supplementary Table S9: La<sub>2</sub>OFCIH<sub>2</sub>, P3m1**

| <b>P3m1 (156); a = 4.048 Å, c = 8.374 Å</b> |                  |       |        |        |        |
|---------------------------------------------|------------------|-------|--------|--------|--------|
| Atom                                        | Wyckoff position | Symm. | x      | y      | z      |
| La1                                         | 1a               | 3m.   | 0.0000 | 0.0000 | 0.6153 |
| La2                                         | 1c               | 3m.   | 0.6667 | 0.3333 | 0.2354 |
| O1                                          | 1c               | 3m.   | 0.6667 | 0.3333 | 0.5166 |
| F1                                          | 1b               | 3m.   | 0.3333 | 0.6667 | 0.7185 |
| Cl1                                         | 1a               | 3m.   | 0.0000 | 0.0000 | 0.0000 |
| H1                                          | 1a               | 3m.   | 0.0000 | 0.0000 | 0.3342 |
| H2                                          | 1b               | 3m.   | 0.3333 | 0.6667 | 0.2672 |

**Supplementary Table S10: La<sub>2</sub>OFCIH<sub>2</sub>, R3m**

| <b>R3m (160); a = 3.712 Å, c = 25.933 Å</b> |                  |       |        |        |        |
|---------------------------------------------|------------------|-------|--------|--------|--------|
| Atom                                        | Wyckoff position | Symm. | x      | y      | z      |
| La1                                         | 3a               | 3m    | 0.0000 | 0.0000 | 0.0000 |
| La2                                         | 3a               | 3m    | 0.0000 | 0.0000 | 0.4603 |
| O1                                          | 3a               | 3m    | 0.0000 | 0.0000 | 0.3660 |
| F1                                          | 3a               | 3m    | 0.0000 | 0.0000 | 0.6315 |
| Cl1                                         | 3a               | 3m    | 0.0000 | 0.0000 | 0.2049 |
| H1                                          | 3a               | 3m    | 0.0000 | 0.0000 | 0.7823 |
| H2                                          | 3a               | 3m    | 0.0000 | 0.0000 | 0.0928 |

**Supplementary Table S11: Gd<sub>2</sub>OFCIH<sub>2</sub>, P3m1**

| <b>P3m1 (156); a = 3.812 Å, c = 8.181 Å</b> |                  |       |        |        |        |
|---------------------------------------------|------------------|-------|--------|--------|--------|
| Atom                                        | Wyckoff position | Symm. | x      | y      | z      |
| Gd1                                         | 1a               | 3m.   | 0.0000 | 0.0000 | 0.0000 |
| Gd2                                         | 1b               | 3m.   | 0.3333 | 0.6667 | 0.3693 |
| O1                                          | 1b               | 3m.   | 0.3333 | 0.6667 | 0.0923 |
| F1                                          | 1c               | 3m.   | 0.6667 | 0.3333 | 0.8874 |
| Cl1                                         | 1a               | 3m.   | 0.0000 | 0.0000 | 0.6009 |
| H1                                          | 1a               | 3m.   | 0.0000 | 0.0000 | 0.2706 |
| H2                                          | 1c               | 3m.   | 0.6667 | 0.3333 | 0.3434 |

**Supplementary Table S12: Gd<sub>2</sub>OFCIH<sub>2</sub>, R3m**

| <b>R3m (160); a = 3.712 Å, c = 25.933 Å</b> |                  |       |        |        |        |
|---------------------------------------------|------------------|-------|--------|--------|--------|
| Atom                                        | Wyckoff position | Symm. | x      | y      | z      |
| La1                                         | 3a               | 3m    | 0.0000 | 0.0000 | 0.0000 |
| La2                                         | 3a               | 3m    | 0.0000 | 0.0000 | 0.4502 |
| O1                                          | 3a               | 3m    | 0.0000 | 0.0000 | 0.3613 |
| F1                                          | 3a               | 3m    | 0.0000 | 0.0000 | 0.6274 |
| Cl1                                         | 3a               | 3m    | 0.0000 | 0.0000 | 0.1887 |
| H1                                          | 3a               | 3m    | 0.0000 | 0.0000 | 0.7735 |
| H2                                          | 3a               | 3m    | 0.0000 | 0.0000 | 0.0843 |

**Supplementary Table S13: LaGdOFCIH<sub>2</sub>, P3m1**

| <b>P3m1 (156); a = 3.939 Å, c = 8.292 Å</b> |                  |       |        |        |        |
|---------------------------------------------|------------------|-------|--------|--------|--------|
| Atom                                        | Wyckoff position | Symm. | x      | y      | z      |
| La1                                         | 1a               | 3m.   | 0.0000 | 0.0000 | 0.6028 |
| Gd1                                         | 1c               | 3m.   | 0.6667 | 0.3333 | 0.2288 |
| O1                                          | 1c               | 3m.   | 0.6667 | 0.3333 | 0.4995 |
| F1                                          | 1b               | 3m.   | 0.3333 | 0.6667 | 0.7163 |
| Cl1                                         | 1a               | 3m.   | 0.0000 | 0.0000 | 0.0000 |
| H1                                          | 1a               | 3m.   | 0.0000 | 0.0000 | 0.3207 |
| H2                                          | 1b               | 3m.   | 0.3333 | 0.6667 | 0.2530 |

**Supplementary Table S14: LaGdOFCIH<sub>2</sub>, R3m**

| <b>R3m (160); a = 3.924 Å, c = 25.246 Å</b> |                  |       |        |        |        |
|---------------------------------------------|------------------|-------|--------|--------|--------|
| Atom                                        | Wyckoff position | Symm. | x      | y      | z      |
| La1                                         | 3a               | 3m    | 0.0000 | 0.0000 | 0.0000 |
| Gd1                                         | 3a               | 3m    | 0.0000 | 0.0000 | 0.4563 |
| O1                                          | 3a               | 3m    | 0.0000 | 0.0000 | 0.3667 |
| F1                                          | 3a               | 3m    | 0.0000 | 0.0000 | 0.6277 |
| Cl1                                         | 3a               | 3m    | 0.0000 | 0.0000 | 0.1971 |
| H1                                          | 3a               | 3m    | 0.0000 | 0.0000 | 0.7806 |
| H2                                          | 3a               | 3m    | 0.0000 | 0.0000 | 0.0916 |

**Supplementary Table S15: Y<sub>2</sub>OCl<sub>2</sub>H<sub>2</sub>, R3m**

| <b>R3m (160); a = 3.756 Å, c = 30.481 Å</b> |                  |       |        |        |        |
|---------------------------------------------|------------------|-------|--------|--------|--------|
| Atom                                        | Wyckoff position | Symm. | x      | y      | z      |
| Y1                                          | 3a               | 3m    | 0.0000 | 0.0000 | 0.0000 |
| Y2                                          | 3a               | 3m    | 0.0000 | 0.0000 | 0.4307 |
| O1                                          | 3a               | 3m    | 0.0000 | 0.0000 | 0.3545 |
| Cl1                                         | 3a               | 3m    | 0.0000 | 0.0000 | 0.1563 |
| Cl2                                         | 3a               | 3m    | 0.0000 | 0.0000 | 0.6094 |
| H1                                          | 3a               | 3m    | 0.0000 | 0.0000 | 0.7540 |
| H2                                          | 3a               | 3m    | 0.0000 | 0.0000 | 0.0698 |

**Supplementary Table S16: La<sub>2</sub>OCl<sub>2</sub>H<sub>2</sub>, R3m**

| <b>R3m (160); a = 4.056 Å, c = 30.999 Å</b> |                  |       |        |        |        |
|---------------------------------------------|------------------|-------|--------|--------|--------|
| Atom                                        | Wyckoff position | Symm. | x      | y      | z      |
| La1                                         | 3a               | 3m    | 0.0000 | 0.0000 | 0.0000 |
| La2                                         | 3a               | 3m    | 0.0000 | 0.0000 | 0.4356 |
| O1                                          | 3a               | 3m    | 0.0000 | 0.0000 | 0.3561 |
| Cl1                                         | 3a               | 3m    | 0.0000 | 0.0000 | 0.1619 |
| Cl2                                         | 3a               | 3m    | 0.0000 | 0.0000 | 0.6092 |
| H1                                          | 3a               | 3m    | 0.0000 | 0.0000 | 0.7548 |
| H2                                          | 3a               | 3m    | 0.0000 | 0.0000 | 0.0739 |

**Supplementary Table S17:** Gd<sub>2</sub>OCl<sub>2</sub>H<sub>2</sub>, R3m

| <b>R3m (160); a = 3.824 Å, c = 30.722 Å</b> |                  |       |        |        |        |
|---------------------------------------------|------------------|-------|--------|--------|--------|
| Atom                                        | Wyckoff position | Symm. | x      | y      | z      |
| Gd1                                         | 3a               | 3m    | 0.0000 | 0.0000 | 0.0000 |
| Gd2                                         | 3a               | 3m    | 0.0000 | 0.0000 | 0.4316 |
| O1                                          | 3a               | 3m    | 0.0000 | 0.0000 | 0.3549 |
| Cl1                                         | 3a               | 3m    | 0.0000 | 0.0000 | 0.1570 |
| Cl2                                         | 3a               | 3m    | 0.0000 | 0.0000 | 0.6096 |
| H1                                          | 3a               | 3m    | 0.0000 | 0.0000 | 0.7545 |
| H2                                          | 3a               | 3m    | 0.0000 | 0.0000 | 0.0704 |

**2. Bond distances and bond angles in Ln<sub>2</sub>OF<sub>2-x</sub>Cl<sub>x</sub>H<sub>2</sub> (Ln = Y, La, Gd)****Supplementary Table S18:** Bond distances (in Å) and bond angles (in degrees) in Y<sub>2</sub>OF<sub>2</sub>H<sub>2</sub>

| <b>Y<sub>2</sub>OF<sub>2</sub>H<sub>2</sub>, P3m1</b> |       |              |       | <b>Y<sub>2</sub>OF<sub>2</sub>H<sub>2</sub>, R3m</b> |       |              |       |
|-------------------------------------------------------|-------|--------------|-------|------------------------------------------------------|-------|--------------|-------|
| Bond                                                  | Value | Angle        | Value | Bond                                                 | Value | Angle        | Value |
| Y1 – Y2                                               | 3.68  |              |       | Y1 – Y2                                              | 3.69  |              |       |
| Y1 – O1                                               | 2.28  | Y1 – O1 – Y2 | 109.9 | Y1 – O1                                              | 2.23  | Y1 – O1 – Y2 | 108.8 |
| Y2 – O1                                               | 2.22  |              |       | Y2 – O1                                              | 2.31  |              |       |
| Y1 – H2                                               | 2.17  | Y2 – H1 – H2 | 166.8 | Y1 – H2                                              | 2.09  | Y2 – H1 – H2 | 169.0 |
| Y2 – H1                                               | 2.15  |              |       | Y2 – H1                                              | 2.13  |              |       |
| H1 – H2                                               | 2.25  |              |       | H1 – H2                                              | 2.22  |              |       |
| H2 – F1                                               | 2.29  | Y1 – H2 – F1 | 180.0 | H2 – F1                                              | 2.23  | Y1 – H2 – F1 | 180.0 |
| Y1 – F2                                               | 2.33  | Y2 – F1 – F2 | 177.8 | Y1 – F2                                              | 2.38  | Y1 – F2 – F1 | 165.2 |
| Y1 – F1                                               | 2.48  |              |       | Y2 – F2                                              | 3.21  |              |       |
| Y2 – F1                                               | 2.59  |              |       | Y2 – F1                                              | 2.48  |              |       |
| F2 – F1                                               | 2.66  |              |       | F2 – F1                                              | 2.85  |              |       |

**Supplementary Table S19:** Bond distances (in Å) and bond angles (in degrees) in La<sub>2</sub>OF<sub>2</sub>H<sub>2</sub>

| <b>La<sub>2</sub>OF<sub>2</sub>H<sub>2</sub>, P3m1</b> |       |                |       | <b>La<sub>2</sub>OF<sub>2</sub>H<sub>2</sub>, R3m</b> |       |                |       |
|--------------------------------------------------------|-------|----------------|-------|-------------------------------------------------------|-------|----------------|-------|
| Bond                                                   | Value | Angle          | Value | Bond                                                  | Value | Angle          | Value |
| La1 – La2                                              | 3.95  |                |       | La1 – La2                                             | 3.98  |                |       |
| La1 – O1                                               | 2.46  | La1 – O1 – La2 | 110.0 | La1 – O1                                              | 2.43  | La1 – O1 – La2 | 109.1 |
| La2 – O1                                               | 2.37  |                |       | La2 – O1                                              | 2.45  |                |       |
| La1 – H2                                               | 2.32  | La2 – H1 – H2  | 173.9 | La1 – H2                                              | 2.24  | La2 – H1 – H2  | 170.9 |
| La2 – H1                                               | 2.33  |                |       | La2 – H1                                              | 2.32  |                |       |
| H1 – H2                                                | 2.38  |                |       | H1 – H2                                               | 2.40  |                |       |
| H2 – F1                                                | 2.37  | La1 – H2 – F1  | 180.0 | H2 – F1                                               | 2.33  | La1 – H2 – F1  | 180.0 |
| La1 – F2                                               | 2.50  | La1 – F1 – F2  | 177.1 | La1 – F2                                              | 2.54  | La1 – F2 – F1  | 172.1 |
| La1 – F1                                               | 2.60  |                |       | La1 – F1                                              | 3.45  |                |       |
| La2 – F1                                               | 2.74  |                |       | La2 – F1                                              | 2.65  |                |       |
| F2 – F1                                                | 2.84  |                |       | F2 – F1                                               | 2.74  |                |       |

**Supplementary Table S20:** Bond distances (in Å) and bond angles (in degrees) in Gd<sub>2</sub>OF<sub>2</sub>H<sub>2</sub>

| Gd <sub>2</sub> OF <sub>2</sub> H <sub>2</sub> , P3m1 |       |                |       | Gd <sub>2</sub> OF <sub>2</sub> H <sub>2</sub> , R3m |       |                |       |
|-------------------------------------------------------|-------|----------------|-------|------------------------------------------------------|-------|----------------|-------|
| Bond                                                  | Value | Angle          | Value | Bond                                                 | Value | Angle          | Value |
| Gd1 – Gd2                                             | 3.75  |                |       | Gd1 – Gd2                                            | 3.76  |                |       |
| Gd1 – O1                                              | 2.32  | Gd1 – O1 – Gd2 | 109.9 | Gd1 – O1                                             | 2.28  | Gd1 – O1 – Gd2 | 108.9 |
| Gd2 – O1                                              | 2.25  |                |       | Gd2 – O1                                             | 2.34  |                |       |
| Gd1 – H2                                              | 2.20  | Gd2 – H1 – H2  | 167.8 | Gd1 – H2                                             | 2.11  | Gd2 – H1 – H2  | 168.9 |
| Gd2 – H1                                              | 2.19  |                |       | Gd2 – H1                                             | 2.18  |                |       |
| H1 – H2                                               | 2.28  |                |       | H1 – H2                                              | 2.27  |                |       |
| H2 – F1                                               | 2.31  | Gd1 – H2 – F1  | 180.0 | H2 – F1                                              | 2.25  | Gd1 – H2 – F1  | 180.0 |
| Gd1 – F2                                              | 2.37  | Gd1 – F1 – F2  | 177.5 | Gd1 – F2                                             | 2.42  | Gd1 – F2 – F1  | 168.2 |
| Gd1 – F1                                              | 2.52  |                |       | Gd2 – F2                                             | 3.02  |                |       |
| Gd2 – F1                                              | 2.63  |                |       | Gd2 – F1                                             | 2.51  |                |       |
| F2 – F1                                               | 2.71  |                |       | F2 – F1                                              | 2.77  |                |       |

**Supplementary Table S21:** Bond distances (in Å) and bond angles (in degrees) in Y<sub>2</sub>OFCIH<sub>2</sub>

| Y <sub>2</sub> OFCIH <sub>2</sub> , P3m1 |       |               |       | Y <sub>2</sub> OFCIH <sub>2</sub> , R3m |       |               |       |
|------------------------------------------|-------|---------------|-------|-----------------------------------------|-------|---------------|-------|
| Bond                                     | Value | Angle         | Value | Bond                                    | Value | Angle         | Value |
| Y1 – Y2                                  | 3.67  |               |       | Y1 – Y2                                 | 3.67  |               |       |
| Y1 – O1                                  | 2.28  | Y1 – O1 – Y2  | 108.7 | Y1 – O1                                 | 2.26  | Y1 – O1 – Y2  | 108.2 |
| Y2 – O1                                  | 2.25  |               |       | Y2 – O1                                 | 2.28  |               |       |
| Y1 – H2                                  | 2.18  | Y2 – H1 – H2  | 169.7 | Y1 – H2                                 | 2.15  | Y2 – H1 – H2  | 171.0 |
| Y2 – H1                                  | 2.17  |               |       | Y2 – H1                                 | 2.16  |               |       |
| H1 – H2                                  | 2.24  |               |       | H1 – H2                                 | 2.22  |               |       |
| H2 – Cl1                                 | 2.68  | Y1 – H2 – Cl1 | 180.0 | H2 – Cl1                                | 2.68  | Y1 – H2 – Cl1 | 180.0 |
| Y1 – F1                                  | 2.35  | Y2 – Cl1 – F1 | 173.1 | Y1 – F1                                 | 2.38  | Y1 – F1 – Cl1 | 153.2 |
| Y1 – Cl1                                 | 3.33  |               |       | Y2 – F1                                 | 4.63  |               |       |
| Y2 – Cl1                                 | 2.86  |               |       | Y2 – Cl1                                | 2.83  |               |       |
| Cl1 – F1                                 | 3.22  |               |       | Cl1 – F1                                | 3.51  |               |       |

**Supplementary Table S22:** Bond distances (in Å) and bond angles (in degrees) in La<sub>2</sub>OFCIH<sub>2</sub>

| La <sub>2</sub> OFCIH <sub>2</sub> , P3m1 |       |                |       | La <sub>2</sub> OFCIH <sub>2</sub> , R3m |       |                |       |
|-------------------------------------------|-------|----------------|-------|------------------------------------------|-------|----------------|-------|
| Bond                                      | Value | Angle          | Value | Bond                                     | Value | Angle          | Value |
| La1 – La2                                 | 3.95  |                |       | La1 – La2                                | 3.94  |                |       |
| La1 – O1                                  | 2.48  | La1 – O1 – La2 | 109.5 | La1 – O1                                 | 2.47  | La1 – O1 – La2 | 109.4 |
| La2 – O1                                  | 2.36  |                |       | La2 – O1                                 | 2.36  |                |       |
| La1 – H2                                  | 2.35  | La2 – H1 – H2  | 173.0 | La1 – H2                                 | 2.33  | La2 – H1 – H2  | 173.1 |
| La2 – H1                                  | 2.35  |                |       | La2 – H1                                 | 2.35  |                |       |
| H1 – H2                                   | 2.40  |                |       | H1 – H2                                  | 2.40  |                |       |
| H2 – Cl1                                  | 2.80  | La1 – H2 – Cl1 | 180.0 | H2 – Cl1                                 | 2.81  | La1 – H2 – Cl1 | 180.0 |
| La1 – F1                                  | 2.49  | La2 – Cl1 – F1 | 174.9 | La1 – F1                                 | 2.49  | La1 – F1 – Cl1 | 155.7 |
| La1 – Cl1                                 | 3.22  |                |       | La2 – F1                                 | 4.29  |                |       |
| La2 – Cl1                                 | 3.06  |                |       | La2 – Cl1                                | 3.04  |                |       |
| Cl1 – F1                                  | 3.32  |                |       | Cl1 – F1                                 | 3.30  |                |       |

**Supplementary Table S23:** Bond distances (in Å) and bond angles (in degrees) in Gd<sub>2</sub>OFCIH<sub>2</sub>

| <b>Gd<sub>2</sub>OFCIH<sub>2</sub>, P3m1</b> |       |                |       | <b>Gd<sub>2</sub>OFCIH<sub>2</sub>, R3m</b> |       |                |       |
|----------------------------------------------|-------|----------------|-------|---------------------------------------------|-------|----------------|-------|
| Bond                                         | Value | Angle          | Value | Bond                                        | Value | Angle          | Value |
| Gd1 – Gd2                                    | 3.74  |                |       | Gd1 – Gd2                                   | 3.74  |                |       |
| Gd1 – O1                                     | 2.33  | Gd1 – O1 – Gd2 | 108.9 | Gd1 – O1                                    | 2.30  | Gd1 – O1 – Gd2 | 108.4 |
| Gd2 – O1                                     | 2.27  |                |       | Gd2 – O1                                    | 2.30  |                |       |
| Gd1 – H2                                     | 2.21  | Gd2 – H1 – H2  | 170.4 | Gd1 – H2                                    | 2.18  | Gd2 – H1 – H2  | 171.8 |
| Gd2 – H1                                     | 2.21  |                |       | Gd2 – H1                                    | 2.20  |                |       |
| H1 – H2                                      | 2.28  |                |       | H1 – H2                                     | 2.26  |                |       |
| H2 – Cl1                                     | 2.70  | Gd1 – H2 – Cl1 | 180.0 | H2 – Cl1                                    | 2.71  | Gd1 – H2 – Cl1 | 180.0 |
| Gd1 – F1                                     | 2.39  | Gd2 – F1 – Cl1 | 173.9 | Gd1 – F1                                    | 2.41  | Gd1 – F1 – Cl1 | 153.7 |
| Gd1 – Cl1                                    | 3.26  |                |       | Gd2 – F1                                    | 4.59  |                |       |
| Gd2 – Cl1                                    | 2.90  |                |       | Gd2 – Cl1                                   | 2.87  |                |       |
| Cl1 – F1                                     | 3.21  |                |       | Cl1 – F1                                    | 3.50  |                |       |

**Supplementary Table S24:** Bond distances (in Å) and bond angles (in degrees) in LaGdOFCIH<sub>2</sub>

| <b>LaGdOFCIH<sub>2</sub>, P3m1</b> |       |                |       | <b>LaGdOFCIH<sub>2</sub>, R3m</b> |       |                |       |
|------------------------------------|-------|----------------|-------|-----------------------------------|-------|----------------|-------|
| Bond                               | Value | Angle          | Value | Bond                              | Value | Angle          | Value |
| La1 – Gd1                          | 3.85  |                |       | La1 – Gd1                         | 3.84  |                |       |
| Gd1 – O1                           | 2.24  | Gd1 – O1 – La1 | 110.6 | Gd1 – O1                          | 2.26  | Gd1 – O1 – La1 | 110.4 |
| La1 – O1                           | 2.43  |                |       | La1 – O1                          | 2.42  |                |       |
| La1 – H2                           | 2.34  | Gd1 – H1 – H2  | 171.2 | La1 – H2                          | 2.31  | Gd1 – H1 – H2  | 171.7 |
| Gd1 – H1                           | 2.28  |                |       | Gd1 – H1                          | 2.28  |                |       |
| H1 – H2                            | 2.34  |                |       | H1 – H2                           | 2.33  |                |       |
| H2 – Cl1                           | 2.66  | La1 – H2 – Cl1 | 180.0 | H2 – Cl1                          | 2.66  | La1 – H2 – Cl1 | 180.0 |
| La1 – F1                           | 2.46  | Gd1 – Cl1 – F1 | 173.9 | La1 – F1                          | 2.47  | La1 – F1 – Cl1 | 156.2 |
| La1 – Cl1                          | 3.29  |                |       | Gd1 – F1                          | 4.33  |                |       |
| Gd1 – Cl1                          | 2.96  |                |       | Gd1 – Cl1                         | 2.93  |                |       |
| Cl1 – F1                           | 3.27  |                |       | Cl1 – F1                          | 3.34  |                |       |

**Supplementary Table S25:** Bond distances (in Å) and bond angles (in degrees) in Y<sub>2</sub>OCl<sub>2</sub>H<sub>2</sub> and La<sub>2</sub>OCl<sub>2</sub>H<sub>2</sub>

| <b>Y<sub>2</sub>OCl<sub>2</sub>H<sub>2</sub>, R3m</b> |       |                |       | <b>La<sub>2</sub>OCl<sub>2</sub>H<sub>2</sub>, R3m</b> |       |                 |       |
|-------------------------------------------------------|-------|----------------|-------|--------------------------------------------------------|-------|-----------------|-------|
| Bond                                                  | Value | Angle          | Value | Bond                                                   | Value | Angle           | Value |
| Y1 – Y2                                               | 3.68  |                |       | La1 – La2                                              | 3.94  |                 |       |
| Y1 – O1                                               | 2.26  | Y1 – O1 – Y2   | 106.6 | La1 – O1                                               | 2.45  | La1 – O1 – La2  |       |
| Y2 – O1                                               | 2.32  |                |       | La2 – O1                                               | 2.47  |                 |       |
| Y1 – H2                                               | 2.13  | Y2 – H1 – H2   | 174.2 | La1 – H2                                               | 2.29  | La2 – H1 – H2   | 180.0 |
| Y2 – H1                                               | 2.19  |                |       | La2 – H1                                               | 2.38  |                 |       |
| H1 – H2                                               | 2.23  |                |       | H1 – H2                                                | 2.38  |                 |       |
| H2 – Cl1                                              | 2.64  | Y1 – H2 – Cl1  | 180.0 | H2 – Cl1                                               | 2.73  | La1 – H2 – Cl1  | 180.0 |
| Y1 – Cl2                                              | 2.78  | Y2 – Cl1 – Cl2 | 159.5 | La1 – Cl2                                              | 2.94  | La1 – Cl2 – Cl1 | 160.8 |
| Y2 – Cl2                                              | 5.45  |                |       | La2 – Cl2                                              | 5.38  |                 |       |
| Y2 – Cl1                                              | 2.78  |                |       | La1 – Cl2                                              | 2.94  |                 |       |
| Cl2 – Cl1                                             | 4.24  |                |       | Cl2 – Cl1                                              | 4.24  |                 |       |



**Supplementary Table S26:** Bond distances (in Å) and bond angles (in degrees) in Gd<sub>2</sub>OCl<sub>2</sub>H<sub>2</sub>

| Gd <sub>2</sub> OCl <sub>2</sub> H <sub>2</sub> , R3m |       |                 |       |  |  |
|-------------------------------------------------------|-------|-----------------|-------|--|--|
| Bond                                                  | Value | Angle           | Value |  |  |
| Gd1 – Gd2                                             | 3.74  |                 |       |  |  |
| Gd1 – O1                                              | 2.30  | Gd1 – O1 – Gd2  | 106.7 |  |  |
| Gd2 – O1                                              | 2.36  |                 |       |  |  |
| Gd1 – H2                                              | 2.16  | Gd2 – H1 – H2   | 174.6 |  |  |
| Gd2 – H1                                              | 2.23  |                 |       |  |  |
| H1 – H2                                               | 2.27  |                 |       |  |  |
| H2 – Cl1                                              | 2.66  | Gd1 – H2 – Cl1  | 180.0 |  |  |
| Gd1 – Cl2                                             | 2.82  | Gd1 – Cl2 – Cl1 | 159.5 |  |  |
| Gd2 – Cl2                                             | 5.47  |                 |       |  |  |
| Gd1 – Cl2                                             | 2.82  |                 |       |  |  |
| Cl2 – Cl1                                             | 4.28  |                 |       |  |  |

**3. Elastic properties of Ln<sub>2</sub>OF<sub>2-x</sub>Cl<sub>x</sub>H<sub>2</sub> (Ln = Y, La, Gd)****Supplementary table S27:** Components of the elasticity tensors C<sub>ij</sub> (in GPa)

| Y <sub>2</sub> OF <sub>2</sub> H <sub>2</sub> (P3m1)  |       |       |      |      |      | Y <sub>2</sub> OF <sub>2</sub> H <sub>2</sub> (R3m)  |       |      |       |       |       |
|-------------------------------------------------------|-------|-------|------|------|------|------------------------------------------------------|-------|------|-------|-------|-------|
| 170.1                                                 | 64.1  | 51.0  | 8.0  | 0    | 0    | 194.5                                                | 68.3  | 26.1 | -12.1 | 0     | 0     |
| 64.1                                                  | 170.1 | 51.0  | -8.0 | 0    | 0    | 68.3                                                 | 194.5 | 26.1 | 12.1  | 0     | 0     |
| 51.0                                                  | 51.0  | 136.3 | 0    | 0    | 0    | 26.1                                                 | 26.1  | 23.2 | 0     | 0     | 0     |
| 8.0                                                   | -8.0  | 0     | 25.6 | 0    | 0    | -12.1                                                | 12.1  | 0    | 31.6  | 0     | 0     |
| 0                                                     | 0     | 0     | 0    | 25.6 | 8.0  | 0                                                    | 0     | 0    | 0     | 31.6  | -12.1 |
| 0                                                     | 0     | 0     | 0    | 8.0  | 53.0 | 0                                                    | 0     | 0    | 0     | -12.1 | 63.1  |
| La <sub>2</sub> OF <sub>2</sub> H <sub>2</sub> (P3m1) |       |       |      |      |      | La <sub>2</sub> OF <sub>2</sub> H <sub>2</sub> (R3m) |       |      |       |       |       |
| 145.3                                                 | 48.6  | 30.9  | 0.4  | 0    | 0    | 173.5                                                | 68.7  | 40.9 | -17.7 | 0     | 0     |
| 48.6                                                  | 145.3 | 30.9  | -0.4 | 0    | 0    | 68.7                                                 | 173.5 | 40.9 | 17.7  | 0     | 0     |
| 30.9                                                  | 30.9  | 117.6 | 0    | 0    | 0    | 40.9                                                 | 40.9  | 70.0 | 0     | 0     | 0     |
| 0.4                                                   | -0.4  | 0     | 20.3 | 0    | 0    | -17.7                                                | 17.7  | 0    | 35.8  | 0     | 0     |
| 0                                                     | 0     | 0     | 0    | 20.3 | 0.4  | 0                                                    | 0     | 0    | 0     | 35.8  | -17.7 |
| 0                                                     | 0     | 0     | 0    | 0.4  | 48.3 | 0                                                    | 0     | 0    | 0     | -17.7 | 52.4  |
| Gd <sub>2</sub> OF <sub>2</sub> H <sub>2</sub> (P3m1) |       |       |      |      |      | Gd <sub>2</sub> OF <sub>2</sub> H <sub>2</sub> (R3m) |       |      |       |       |       |
| 164.8                                                 | 59.3  | 45.0  | 4.2  | 0    | 0    | 192.4                                                | 69.5  | 32.4 | -15.0 | 0     | 0     |
| 59.3                                                  | 164.8 | 45.0  | -4.2 | 0    | 0    | 69.5                                                 | 192.4 | 32.4 | 15.0  | 0     | 0     |
| 45.0                                                  | 45.0  | 132.7 | 0    | 0    | 0    | 32.4                                                 | 32.4  | 31.2 | 0     | 0     | 0     |
| 4.2                                                   | -4.2  | 0     | 25.5 | 0    | 0    | -15.0                                                | 15.0  | 0    | 37.9  | 0     | 0     |
| 0                                                     | 0     | 0     | 0    | 25.5 | 4.2  | 0                                                    | 0     | 0    | 0     | 37.9  | -15.0 |
| 0                                                     | 0     | 0     | 0    | 4.2  | 52.7 | 0                                                    | 0     | 0    | 0     | -15.0 | 61.5  |

| Y <sub>2</sub> OFClH <sub>2</sub> (P3m1)  |       |      |      |      |      | Y <sub>2</sub> OFClH <sub>2</sub> (R3m)  |       |      |      |      |      |
|-------------------------------------------|-------|------|------|------|------|------------------------------------------|-------|------|------|------|------|
| 167.2                                     | 45.4  | 31.3 | -5.2 | 0    | 0    | 158.9                                    | 43.2  | 11.2 | -2.2 | 0    | 0    |
| 45.4                                      | 167.2 | 31.3 | 5.2  | 0    | 0    | 43.2                                     | 158.9 | 11.2 | 2.2  | 0    | 0    |
| 31.3                                      | 31.3  | 41.2 | 0    | 0    | 0    | 11.2                                     | 11.2  | 19.6 | 0    | 0    | 0    |
| -5.2                                      | 5.2   | 0    | 24.4 | 0    | 0    | -2.2                                     | 2.2   | 0    | 5.9  | 0    | 0    |
| 0                                         | 0     | 0    | 0    | 24.4 | -5.2 | 0                                        | 0     | 0    | 0    | 5.9  | -2.2 |
| 0                                         | 0     | 0    | 0    | -5.2 | 60.9 | 0                                        | 0     | 0    | 0    | -2.2 | 57.9 |
| La <sub>2</sub> OFClH <sub>2</sub> (P3m1) |       |      |      |      |      | La <sub>2</sub> OFClH <sub>2</sub> (R3m) |       |      |      |      |      |
| 143.6                                     | 40.7  | 28.2 | -4.0 | 0    | 0    | 139.4                                    | 44.5  | 21.7 | -6.9 | 0    | 0    |
| 40.7                                      | 143.6 | 28.2 | 4.0  | 0    | 0    | 44.5                                     | 139.4 | 21.7 | 6.9  | 0    | 0    |

|                                                       |       |      |      |      |      |                                                       |       |      |      |      |      |
|-------------------------------------------------------|-------|------|------|------|------|-------------------------------------------------------|-------|------|------|------|------|
| 28.2                                                  | 28.2  | 78.9 | 0    | 0    | 0    | 21.7                                                  | 21.7  | 27.3 | 0    | 0    | 0    |
| -4.0                                                  | 4.0   | 0    | 18.8 | 0    | 0    | -6.9                                                  | 6.9   | 0    | 14.4 | 0    | 0    |
| 0                                                     | 0     | 0    | 0    | 18.8 | -4.0 | 0                                                     | 0     | 0    | 0    | 14.4 | -6.9 |
| 0                                                     | 0     | 0    | 0    | -4.0 | 47.0 | 0                                                     | 0     | 0    | 0    | -6.9 | 47.4 |
| Gd <sub>2</sub> OFCIH <sub>2</sub> (P3m1)             |       |      |      |      |      | Gd <sub>2</sub> OFCIH <sub>2</sub> (R3m)              |       |      |      |      |      |
| 158.7                                                 | 44.4  | 33.0 | -4.9 | 0    | 0    | 151.5                                                 | 41.2  | 12.0 | -2.5 | 0    | 0    |
| 44.4                                                  | 158.7 | 33.0 | 4.9  | 0    | 0    | 41.2                                                  | 151.5 | 12.0 | 2.5  | 0    | 0    |
| 33.0                                                  | 33.0  | 52.8 | 0    | 0    | 0    | 12.0                                                  | 12.0  | 18.6 | 0    | 0    | 0    |
| -4.9                                                  | 4.9   | 0    | 24.7 | 0    | 0    | -2.5                                                  | 2.5   | 0    | 6.1  | 0    | 0    |
| 0                                                     | 0     | 0    | 0    | 24.7 | -4.9 | 0                                                     | 0     | 0    | 0    | 6.1  | -2.5 |
| 0                                                     | 0     | 0    | 0    | -4.9 | 57.1 | 0                                                     | 0     | 0    | 0    | -2.5 | 55.1 |
| LaGdOFCIH <sub>2</sub> (P3m1)                         |       |      |      |      |      | LaGdOFCIH <sub>2</sub> (R3m)                          |       |      |      |      |      |
| 140.0                                                 | 42.2  | 28.4 | -2.5 | 0    | 0    | 143.6                                                 | 42.7  | 20.4 | -6.4 | 0    | 0    |
| 42.2                                                  | 140.0 | 28.4 | 2.5  | 0    | 0    | 42.7                                                  | 143.6 | 20.4 | 6.4  | 0    | 0    |
| 28.4                                                  | 28.4  | 71.1 | 0    | 0    | 0    | 20.4                                                  | 20.4  | 25.1 | 0    | 0    | 0    |
| -2.5                                                  | 2.5   | 0    | 20.0 | 0    | 0    | -6.4                                                  | 6.4   | 0    | 12.9 | 0    | 0    |
| 0                                                     | 0     | 0    | 0    | 20.0 | -2.5 | 0                                                     | 0     | 0    | 0    | 12.9 | -6.4 |
| 0                                                     | 0     | 0    | 0    | -2.5 | 48.9 | 0                                                     | 0     | 0    | 0    | -6.4 | 50.5 |
| Y <sub>2</sub> OCl <sub>2</sub> H <sub>2</sub> (R3m)  |       |      |      |      |      | La <sub>2</sub> OCl <sub>2</sub> H <sub>2</sub> (R3m) |       |      |      |      |      |
| 124.4                                                 | 34.1  | 2.6  | -0.2 | 0    | 0    | 98.8                                                  | 30.0  | 2.9  | -0.4 | 0    | 0    |
| 34.1                                                  | 124.4 | 2.6  | 0.2  | 0    | 0    | 30.0                                                  | 98.8  | 2.9  | 0.4  | 0    | 0    |
| 2.6                                                   | 2.6   | 8.8  | 0    | 0    | 0    | 2.9                                                   | 2.9   | 7.7  | 0    | 0    | 0    |
| -0.2                                                  | 0.2   | 0    | 1.5  | 0    | 0    | -0.4                                                  | 0.4   | 0    | 1.4  | 0    | 0    |
| 0                                                     | 0     | 0    | 0    | 1.5  | -0.2 | 0                                                     | 0     | 0    | 0    | 1.4  | -0.4 |
| 0                                                     | 0     | 0    | 0    | -0.2 | 45.1 | 0                                                     | 0     | 0    | 0    | -0.4 | 34.4 |
| Gd <sub>2</sub> OCl <sub>2</sub> H <sub>2</sub> (R3m) |       |      |      |      |      |                                                       |       |      |      |      |      |
| 116.7                                                 | 32.3  | 2.3  | -0.2 | 0    | 0    |                                                       |       |      |      |      |      |
| 32.3                                                  | 116.7 | 2.3  | 0.2  | 0    | 0    |                                                       |       |      |      |      |      |
| 2.3                                                   | 2.3   | 7.7  | 0    | 0    | 0    |                                                       |       |      |      |      |      |
| -0.2                                                  | 0.2   | 0    | 1.0  | 0    | 0    |                                                       |       |      |      |      |      |
| 0                                                     | 0     | 0    | 0    | 1.0  | -0.2 |                                                       |       |      |      |      |      |
| 0                                                     | 0     | 0    | 0    | -0.2 | 42.2 |                                                       |       |      |      |      |      |

**Supplementary table S28:** Eigenvalues ( $\lambda$ ) of the elasticity tensor (in Gpa)

|                                                       | $\lambda_1$ | $\lambda_2$ | $\lambda_3$ | $\lambda_4$ | $\lambda_5$ | $\lambda_6$ |
|-------------------------------------------------------|-------------|-------------|-------------|-------------|-------------|-------------|
| Y <sub>2</sub> OF <sub>2</sub> H <sub>2</sub> (P3m1)  | 23.4        | 24.0        | 55.1        | 98.1        | 107.5       | 272.4       |
| Y <sub>2</sub> OF <sub>2</sub> H <sub>2</sub> (R3m)   | 17.7        | 27.4        | 28.6        | 67.3        | 129.3       | 268.3       |
| La <sub>2</sub> OF <sub>2</sub> H <sub>2</sub> (P3m1) | 20.3        | 20.3        | 48.3        | 96.7        | 97.7        | 213.8       |
| La <sub>2</sub> OF <sub>2</sub> H <sub>2</sub> (R3m)  | 24.5        | 27.6        | 52.4        | 63.6        | 112.9       | 259.8       |
| Gd <sub>2</sub> OF <sub>2</sub> H <sub>2</sub> (P3m1) | 24.9        | 25.1        | 53.4        | 100.1       | 105.9       | 256.7       |
| Gd <sub>2</sub> OF <sub>2</sub> H <sub>2</sub> (R3m)  | 22.5        | 30.6        | 32.9        | 68.7        | 127.9       | 270.7       |
| Y <sub>2</sub> OFCIH <sub>2</sub> (P3m1)              | 23.7        | 23.8        | 30.5        | 61.6        | 122.4       | 223.4       |
| Y <sub>2</sub> OFCIH <sub>2</sub> (R3m)               | 5.8         | 5.8         | 18.2        | 58.0        | 115.9       | 203.4       |
| La <sub>2</sub> OFCIH <sub>2</sub> (P3m1)             | 18.3        | 18.4        | 47.5        | 64.6        | 94.3        | 189.7       |
| La <sub>2</sub> OFCIH <sub>2</sub> (R3m)              | 13.0        | 13.2        | 21.5        | 48.8        | 96.1        | 189.7       |
| Gd <sub>2</sub> OFCIH <sub>2</sub> (P3m1)             | 24.0        | 24.2        | 39.5        | 57.9        | 114.8       | 216.4       |
| Gd <sub>2</sub> OFCIH <sub>2</sub> (R3m)              | 6.0         | 6.0         | 17.0        | 55.3        | 110.4       | 194.3       |
| LaGdOFCIH <sub>2</sub> (P3m1)                         | 19.8        | 19.9        | 49.1        | 58.1        | 97.9        | 195.1       |
| LaGdOFCIH <sub>2</sub> (R3m)                          | 11.8        | 12.0        | 20.0        | 51.1        | 101.9       | 191.3       |
| Y <sub>2</sub> OCl <sub>2</sub> H <sub>2</sub> (R3m)  | 1.5         | 1.5         | 8.8         | 45.1        | 90.3        | 158.5       |
| La <sub>2</sub> OCl <sub>2</sub> H <sub>2</sub> (R3m) | 1.4         | 1.4         | 7.6         | 34.4        | 68.8        | 128.9       |
| Gd <sub>2</sub> OCl <sub>2</sub> H <sub>2</sub> (R3m) | 1.0         | 1.0         | 7.6         | 42.2        | 84.3        | 149.0       |

Spatial distributions of the shear modulus and Poisson's ratio were analyzed and visualized by using program tools implemented in ELATE open-source online application [1,2].

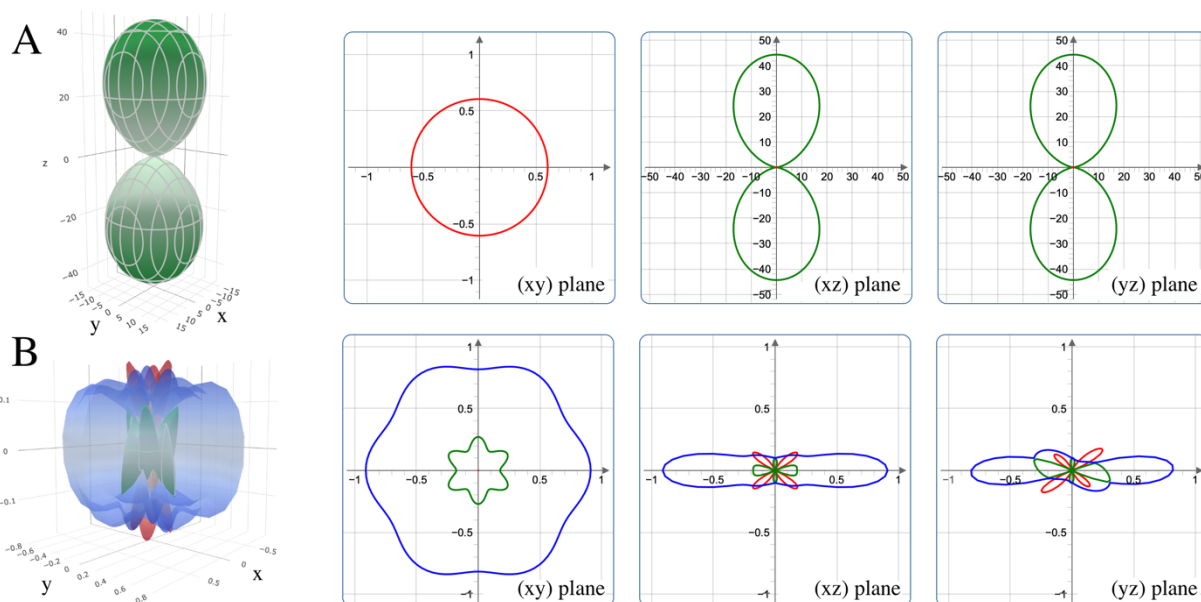

**Supplementary Figure S1:** Spatial distribution of the A) linear compressibility (in  $TPa^{-1}$ ) and B) Poisson's ratio in  $Y_2OF_2H_2$  (R3m). Green and blue colors represent the minimal and maximal values, respectively. Red color denotes the negative values

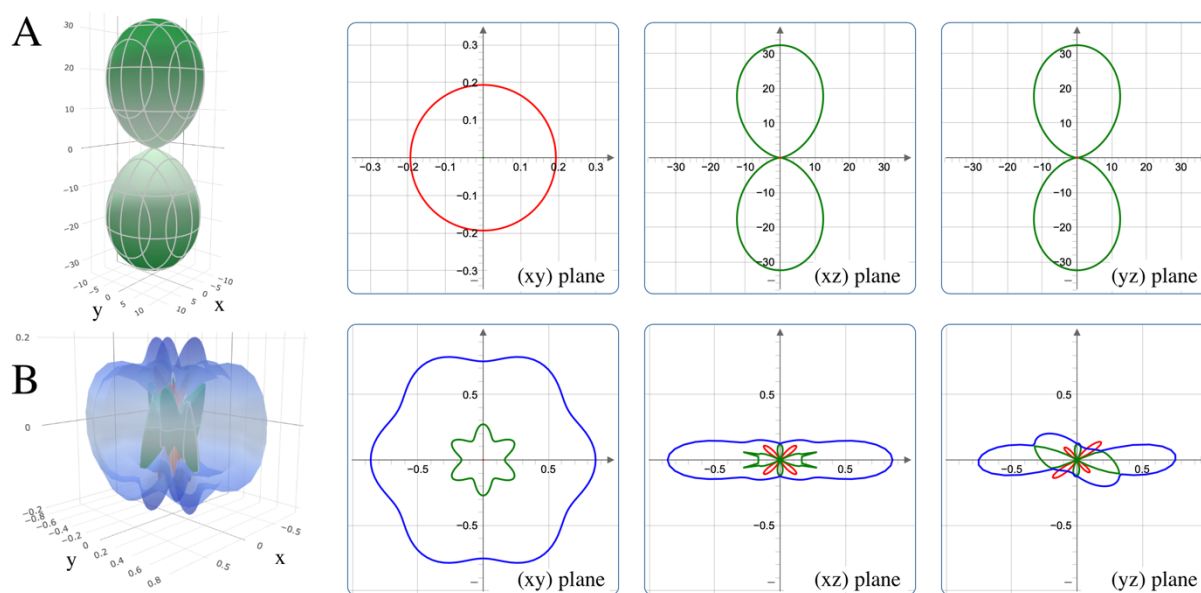

**Supplementary Figure S2:** Spatial distribution of the A) linear compressibility (in  $TPa^{-1}$ ) and B) Poisson's ratio in  $Gd_2OF_2H_2$  (R3m). Green and blue colors represent the minimal and maximal values, respectively. Red color denotes the negative values

#### 4. Zone-centered optical vibrational modes calculated in the harmonic approximation

The frequencies were classified by using the program tools described in Ref. [3]

**Supplementary Table S29:**  $\text{Y}_2\text{OF}_2\text{H}_2$  (P3m1).  $\Gamma_{\text{optic}} = 6A_1 + 6E$

| Frequency             | Mode symmetry | Vibrational displacements |
|-----------------------|---------------|---------------------------|
| 1317 $\text{cm}^{-1}$ | $A_1$         | H2 – H1                   |
| 1311 $\text{cm}^{-1}$ | E             | H2 – H2                   |
| 843 $\text{cm}^{-1}$  | E             | H1 – H2 – O1              |
| 673 $\text{cm}^{-1}$  | $A_1$         | H1 – Y2                   |
| 495 $\text{cm}^{-1}$  | $A_1$         | O1 – F1 – Y1              |
| 408 $\text{cm}^{-1}$  | E             | F1 – O1 – Y1              |
| 347 $\text{cm}^{-1}$  | $A_1$         | F1 – F2 – Y1 – Y2         |
| 286 $\text{cm}^{-1}$  | E             | F2 – O1 – Y1              |
| 207 $\text{cm}^{-1}$  | $A_1$         | F1 – F2 – Y2              |
| 194 $\text{cm}^{-1}$  | $A_1$         | Y1 – Y2 – F2              |
| 168 $\text{cm}^{-1}$  | E             | F1 – Y1 – Y2              |
| 106 $\text{cm}^{-1}$  | E             | Y1 – Y2                   |

**Supplementary Table S30:**  $\text{Y}_2\text{OF}_2\text{H}_2$  (R3m).  $\Gamma_{\text{optic}} = 6A_1 + 6E$

| Frequency             | Mode symmetry | Vibrational displacements |
|-----------------------|---------------|---------------------------|
| 1434 $\text{cm}^{-1}$ | $A_1$         | H2 – H1                   |
| 1352 $\text{cm}^{-1}$ | E             | H1 – H2                   |
| 850 $\text{cm}^{-1}$  | E             | H2 – H1 – O1              |
| 693 $\text{cm}^{-1}$  | $A_1$         | H1 – Y2                   |
| 465 $\text{cm}^{-1}$  | $A_1$         | O1 – Y1 – F1              |
| 425 $\text{cm}^{-1}$  | E             | O1 – F1 – Y2              |
| 359 $\text{cm}^{-1}$  | $A_1$         | F1 – Y1 – Y2              |
| 251 $\text{cm}^{-1}$  | E             | F1 – F2 – Y1              |
| 238 $\text{cm}^{-1}$  | $A_1$         | F2 – F1 – Y2              |
| 164 $\text{cm}^{-1}$  | E             | F1 – Y2                   |
| 161 $\text{cm}^{-1}$  | $A_1$         | F2 – F1 – Y1 – Y2         |
| 102 $\text{cm}^{-1}$  | E             | Y1 – Y2 – F1              |

**Supplementary Table S31:**  $\text{La}_2\text{OF}_2\text{H}_2$  (P3m1).  $\Gamma_{\text{optic}} = 6A_1 + 6E$

| Frequency             | Mode symmetry | Vibrational displacements |
|-----------------------|---------------|---------------------------|
| 1243 $\text{cm}^{-1}$ | $A_1$         | H2 – H1                   |
| 1155 $\text{cm}^{-1}$ | E             | H1 – H2                   |
| 723 $\text{cm}^{-1}$  | E             | H2 – H1                   |
| 583 $\text{cm}^{-1}$  | $A_1$         | H1 – La2                  |
| 429 $\text{cm}^{-1}$  | $A_1$         | O1 – La2                  |
| 338 $\text{cm}^{-1}$  | E             | O1 – F1                   |
| 283 $\text{cm}^{-1}$  | $A_1$         | O1 – F1 – La1             |
| 242 $\text{cm}^{-1}$  | E             | F2 – O1 – La1             |
| 203 $\text{cm}^{-1}$  | $A_1$         | F2 – F1 – La1 – La2       |
| 151 $\text{cm}^{-1}$  | $A_1$         | La1 – La2 – F1            |
| 145 $\text{cm}^{-1}$  | E             | F1 – La2                  |
| 82 $\text{cm}^{-1}$   | E             | La1 – La2 – F2            |

**Supplementary Table S32:**  $\text{La}_2\text{OF}_2\text{H}_2$  (R3m).  $\Gamma_{\text{optic}} = 6A_1 + 6E$ 

| Frequency             | Mode symmetry | Vibrational displacements |
|-----------------------|---------------|---------------------------|
| 1319 $\text{cm}^{-1}$ | $A_1$         | H2 – H1                   |
| 1183 $\text{cm}^{-1}$ | E             | H1 – H2                   |
| 721 $\text{cm}^{-1}$  | E             | H2 – H1 – O1              |
| 558 $\text{cm}^{-1}$  | $A_1$         | H1 – La2                  |
| 406 $\text{cm}^{-1}$  | $A_1$         | O1 – La1 – F1             |
| 333 $\text{cm}^{-1}$  | E             | O1 – F2                   |
| 291 $\text{cm}^{-1}$  | $A_1$         | F1 – F2 – La1 – La2       |
| 248 $\text{cm}^{-1}$  | E             | F2 – O1 – La1             |
| 178 $\text{cm}^{-1}$  | $A_1$         | F1 – F2 – La1             |
| 153 $\text{cm}^{-1}$  | E             | F1 – La2                  |
| 133 $\text{cm}^{-1}$  | $A_1$         | La1 – La2 – F1            |
| 82 $\text{cm}^{-1}$   | E             | La1 – La2 – F1            |

**Supplementary Table S33:**  $\text{Gd}_2\text{OF}_2\text{H}_2$  (P3m1).  $\Gamma_{\text{optic}} = 6A_1 + 6E$ 

| Frequency             | Mode symmetry | Vibrational displacements |
|-----------------------|---------------|---------------------------|
| 1303 $\text{cm}^{-1}$ | $A_1$         | H2 – H1                   |
| 1269 $\text{cm}^{-1}$ | E             | H1 – H2                   |
| 788 $\text{cm}^{-1}$  | E             | H2 – H1                   |
| 652 $\text{cm}^{-1}$  | $A_1$         | H1 – Gd2                  |
| 477 $\text{cm}^{-1}$  | $A_1$         | O1 – F1 – Gd1             |
| 389 $\text{cm}^{-1}$  | E             | O1 – F2                   |
| 320 $\text{cm}^{-1}$  | $A_1$         | F1 – F2 – Gd1 – Gd2       |
| 269 $\text{cm}^{-1}$  | E             | F2 – O1 – Gd1             |
| 200 $\text{cm}^{-1}$  | $A_1$         | F2 – F1 – Gd2             |
| 159 $\text{cm}^{-1}$  | E             | F1 – Gd1                  |
| 153 $\text{cm}^{-1}$  | $A_1$         | F2 – Gd1 – Gd2            |
| 81 $\text{cm}^{-1}$   | E             | Gd1 – Gd2 – F2            |

**Supplementary Table S34:**  $\text{Gd}_2\text{OF}_2\text{H}_2$  (R3m).  $\Gamma_{\text{optic}} = 6A_1 + 6E$ 

| Frequency             | Mode symmetry | Vibrational displacements |
|-----------------------|---------------|---------------------------|
| 1418 $\text{cm}^{-1}$ | $A_1$         | H2 – H1                   |
| 1298 $\text{cm}^{-1}$ | E             | H1 – H2                   |
| 799 $\text{cm}^{-1}$  | E             | H2 – H1 – O1              |
| 661 $\text{cm}^{-1}$  | $A_1$         | H1 – Gd2                  |
| 448 $\text{cm}^{-1}$  | $A_1$         | O1 – Gd1 – F2             |
| 395 $\text{cm}^{-1}$  | E             | O1 – F1                   |
| 333 $\text{cm}^{-1}$  | $A_1$         | F1 – F2 – Gd1 – Gd2       |
| 249 $\text{cm}^{-1}$  | E             | F2 – O1 – Gd1             |
| 206 $\text{cm}^{-1}$  | $A_1$         | F1 – F2 – Gd2             |
| 163 $\text{cm}^{-1}$  | E             | F1 – Gd2                  |
| 128 $\text{cm}^{-1}$  | $A_1$         | Gd1 – Gd2 – F1            |
| 80 $\text{cm}^{-1}$   | E             | Gd1 – Gd2                 |

**Supplementary Table S35:** Y<sub>2</sub>OFCIH<sub>2</sub> (P3m1).  $\Gamma_{\text{optic}} = 6A_1 + 6E$ 

| Frequency             | Mode symmetry  | Vibrational displacements |
|-----------------------|----------------|---------------------------|
| 1272 cm <sup>-1</sup> | E              | H1 – H2                   |
| 1233 cm <sup>-1</sup> | A <sub>1</sub> | H2 – H1                   |
| 847 cm <sup>-1</sup>  | E              | H1 – H2 – O1              |
| 681 cm <sup>-1</sup>  | A <sub>1</sub> | H1 – Y2                   |
| 488 cm <sup>-1</sup>  | A <sub>1</sub> | F1 – O1 – Y1              |
| 403 cm <sup>-1</sup>  | E              | O1 – F1 – Y1              |
| 315 cm <sup>-1</sup>  | A <sub>1</sub> | F1 – Cl1 – Y1 – Y2        |
| 246 cm <sup>-1</sup>  | E              | F1 – O1 – Y1              |
| 221 cm <sup>-1</sup>  | A <sub>1</sub> | F1 – Cl1 – Y2             |
| 156 cm <sup>-1</sup>  | A <sub>1</sub> | Cl1 – Y1 – Y2             |
| 152 cm <sup>-1</sup>  | E              | Cl1 – Y2                  |
| 96 cm <sup>-1</sup>   | E              | Y1 – Y2 – Cl1             |

**Supplementary Table S36:** Y<sub>2</sub>OFCIH<sub>2</sub> (R3m).  $\Gamma_{\text{optic}} = 6A_1 + 6E$ 

| Frequency             | Mode symmetry  | Vibrational displacements |
|-----------------------|----------------|---------------------------|
| 1285 cm <sup>-1</sup> | E              | H1 – H2                   |
| 1274 cm <sup>-1</sup> | A <sub>1</sub> | H2 – H1                   |
| 856 cm <sup>-1</sup>  | E              | H2 – H1 – O1              |
| 686 cm <sup>-1</sup>  | A <sub>1</sub> | H1 – Y2                   |
| 479 cm <sup>-1</sup>  | A <sub>1</sub> | O1 – Y1 – F1              |
| 411 cm <sup>-1</sup>  | E              | O1 – F1 – Y1              |
| 314 cm <sup>-1</sup>  | A <sub>1</sub> | F1 – Cl1 – Y1 – Y2        |
| 240 cm <sup>-1</sup>  | A <sub>1</sub> | Cl1 – F1 – Y2             |
| 231 cm <sup>-1</sup>  | E              | F1 – Y2 – O1              |
| 154 cm <sup>-1</sup>  | A <sub>1</sub> | Cl1 – F1 – Y1 – Y2        |
| 154 cm <sup>-1</sup>  | E              | Cl1 – Y2                  |
| 90 cm <sup>-1</sup>   | E              | Y1 – Y2 – Cl1             |

**Supplementary Table S37:** La<sub>2</sub>OFCIH<sub>2</sub> (P3m1).  $\Gamma_{\text{optic}} = 6A_1 + 6E$ 

| Frequency             | Mode symmetry  | Vibrational displacements |
|-----------------------|----------------|---------------------------|
| 1121 cm <sup>-1</sup> | E              | H1 – H2                   |
| 1119 cm <sup>-1</sup> | A <sub>1</sub> | H2 – H1                   |
| 762 cm <sup>-1</sup>  | E              | H2 – H1                   |
| 562 cm <sup>-1</sup>  | A <sub>1</sub> | H1 – La2                  |
| 438 cm <sup>-1</sup>  | A <sub>1</sub> | O1 – F1 – La1             |
| 332 cm <sup>-1</sup>  | E              | O1 – F1                   |
| 256 cm <sup>-1</sup>  | A <sub>1</sub> | F1 – Cl1 – La1 – La2      |
| 222 cm <sup>-1</sup>  | E              | F1 – O1 – La1             |
| 180 cm <sup>-1</sup>  | A <sub>1</sub> | Cl1 – F1 – La2            |
| 140 cm <sup>-1</sup>  | A <sub>1</sub> | La1 – La2 – Cl1           |
| 128 cm <sup>-1</sup>  | E              | Cl1 – La2                 |
| 75 cm <sup>-1</sup>   | E              | La1 – La2 – Cl1           |

**Supplementary Table S38:** La<sub>2</sub>OFCIH<sub>2</sub> (R3m).  $\Gamma_{\text{optic}} = 6A_1 + 6E$ 

| Frequency             | Mode symmetry  | Vibrational displacements |
|-----------------------|----------------|---------------------------|
| 1144 cm <sup>-1</sup> | A <sub>1</sub> | H2 – H1                   |
| 1127 cm <sup>-1</sup> | E              | H1 – H2                   |
| 768 cm <sup>-1</sup>  | E              | H2 – H1 – O1              |
| 565 cm <sup>-1</sup>  | A <sub>1</sub> | H1 – La2                  |
| 435 cm <sup>-1</sup>  | A <sub>1</sub> | O1 – La1 – F1             |
| 333 cm <sup>-1</sup>  | E              | O1 – F1                   |
| 258 cm <sup>-1</sup>  | A <sub>1</sub> | F1 – Cl1 – La1 – La2      |
| 225 cm <sup>-1</sup>  | E              | F1 – O1 – La1             |
| 176 cm <sup>-1</sup>  | A <sub>1</sub> | F1 – Cl1 – La2            |
| 130 cm <sup>-1</sup>  | A <sub>1</sub> | La1 – La2 – Cl1           |
| 128 cm <sup>-1</sup>  | E              | Cl1 – La2                 |
| 73 cm <sup>-1</sup>   | E              | La1 – La2 – Cl1 – F1      |

**Supplementary Table S39:** Gd<sub>2</sub>OFCIH<sub>2</sub> (P3m1).  $\Gamma_{\text{optic}} = 6A_1 + 6E$ 

| Frequency             | Mode symmetry  | Vibrational displacements |
|-----------------------|----------------|---------------------------|
| 1228 cm <sup>-1</sup> | E              | H1 – H2                   |
| 1208 cm <sup>-1</sup> | A <sub>1</sub> | H2 – H1                   |
| 789 cm <sup>-1</sup>  | E              | H2 – H1                   |
| 656 cm <sup>-1</sup>  | A <sub>1</sub> | H1 – Gd2                  |
| 474 cm <sup>-1</sup>  | A <sub>1</sub> | O1 – F1 – Gd1             |
| 382 cm <sup>-1</sup>  | E              | O1 – F1                   |
| 289 cm <sup>-1</sup>  | A <sub>1</sub> | F1 – Cl1 – Gd1 – Gd2      |
| 235 cm <sup>-1</sup>  | E              | F1 – O1 – Gd1             |
| 195 cm <sup>-1</sup>  | A <sub>1</sub> | Cl1 – F1 – Gd2            |
| 139 cm <sup>-1</sup>  | E              | Cl1 – Gd2                 |
| 131 cm <sup>-1</sup>  | A <sub>1</sub> | Cl1 – Gd1 – Gd2           |
| 77 cm <sup>-1</sup>   | E              | Gd1 – Gd2 – Cl1 – F1      |

**Supplementary Table S40:** Gd<sub>2</sub>OFCIH<sub>2</sub> (R3m).  $\Gamma_{\text{optic}} = 6A_1 + 6E$ 

| Frequency             | Mode symmetry  | Vibrational displacements |
|-----------------------|----------------|---------------------------|
| 1254 cm <sup>-1</sup> | A <sub>1</sub> | H2 – H1                   |
| 1242 cm <sup>-1</sup> | E              | H1 – H2                   |
| 808 cm <sup>-1</sup>  | E              | H2 – H1 – O1              |
| 661 cm <sup>-1</sup>  | A <sub>1</sub> | H1 – Gd2                  |
| 464 cm <sup>-1</sup>  | A <sub>1</sub> | O1 – Gd1 – F1             |
| 389 cm <sup>-1</sup>  | E              | O1 – F1                   |
| 286 cm <sup>-1</sup>  | A <sub>1</sub> | F1 – Cl1 – Gd1 – Gd2      |
| 221 cm <sup>-1</sup>  | E              | F1 – O1 – Gd1             |
| 215 cm <sup>-1</sup>  | A <sub>1</sub> | Cl1 – F1 – Gd2            |
| 138 cm <sup>-1</sup>  | E              | Cl1 – Gd2                 |
| 126 cm <sup>-1</sup>  | A <sub>1</sub> | Gd1 – Gd2 – Cl1 – F1      |
| 72 cm <sup>-1</sup>   | E              | Gd1 – Gd2 – Cl1 – F1      |

**Supplementary Table S41:** LaGdOFCIH<sub>2</sub> (P3m1).  $\Gamma_{\text{optic}} = 6A_1 + 6E$ 

| Frequency             | Mode symmetry  | Vibrational displacements |
|-----------------------|----------------|---------------------------|
| 1171 cm <sup>-1</sup> | A <sub>1</sub> | H2 – H1                   |
| 1111 cm <sup>-1</sup> | E              | H1 – H2                   |
| 656 cm <sup>-1</sup>  | A <sub>1</sub> | H1 – La1                  |
| 644 cm <sup>-1</sup>  | E              | H2 – H1                   |
| 468 cm <sup>-1</sup>  | A <sub>1</sub> | O1 – F1 – Gd1             |
| 350 cm <sup>-1</sup>  | E              | O1 – F1                   |
| 275 cm <sup>-1</sup>  | A <sub>1</sub> | F1 – Cl1 – La1 – Gd1      |
| 253 cm <sup>-1</sup>  | E              | F1 – O1 – La1             |
| 184 cm <sup>-1</sup>  | A <sub>1</sub> | Cl1 – F1 – Gd1            |
| 139 cm <sup>-1</sup>  | A <sub>1</sub> | Cl1 – La1 – Gd1           |
| 121 cm <sup>-1</sup>  | E              | Cl1 – Gd1                 |
| 75 cm <sup>-1</sup>   | E              | Gd1 – La1 – Cl1 – F1      |

**Supplementary Table S42:** LaGdOFCIH<sub>2</sub> (R3m).  $\Gamma_{\text{optic}} = 6A_1 + 6E$ 

| Frequency             | Mode symmetry  | Vibrational displacements |
|-----------------------|----------------|---------------------------|
| 1199 cm <sup>-1</sup> | A <sub>1</sub> | H2 – H1                   |
| 1117 cm <sup>-1</sup> | E              | H1 – H2                   |
| 661 cm <sup>-1</sup>  | E              | H2 – H1 – O1              |
| 660 cm <sup>-1</sup>  | A <sub>1</sub> | H1 – Gd1                  |
| 462 cm <sup>-1</sup>  | A <sub>1</sub> | O1 – La1 – F1             |
| 352 cm <sup>-1</sup>  | E              | O1 – F1                   |
| 275 cm <sup>-1</sup>  | A <sub>1</sub> | F1 – Cl1 – La1 – Gd1      |
| 249 cm <sup>-1</sup>  | E              | F1 – O1 – La1             |
| 188 cm <sup>-1</sup>  | A <sub>1</sub> | Cl1 – F1 – Gd1            |
| 134 cm <sup>-1</sup>  | A <sub>1</sub> | Gd1 – La1 – Cl1 – F1      |
| 119 cm <sup>-1</sup>  | E              | Cl1 – Gd1                 |
| 72 cm <sup>-1</sup>   | E              | La1 – Gd1 – Cl1 – F1      |

**Supplementary Table S43:** Y<sub>2</sub>OCl<sub>2</sub>H<sub>2</sub> (R3m).  $\Gamma_{\text{optic}} = 6A_1 + 6E$ 

| Frequency             | Mode symmetry  | Vibrational displacements |
|-----------------------|----------------|---------------------------|
| 1325 cm <sup>-1</sup> | A <sub>1</sub> | H2 – H1                   |
| 1226 cm <sup>-1</sup> | E              | H1 – H2                   |
| 787 cm <sup>-1</sup>  | E              | H2 – H1 – O1              |
| 688 cm <sup>-1</sup>  | A <sub>1</sub> | H1 – Y2                   |
| 456 cm <sup>-1</sup>  | A <sub>1</sub> | O1 – Y1                   |
| 383 cm <sup>-1</sup>  | E              | O1 – Y1                   |
| 280 cm <sup>-1</sup>  | A <sub>1</sub> | Cl1 – Cl2 – Y1 – Y2       |
| 250 cm <sup>-1</sup>  | A <sub>1</sub> | Cl1 – Cl2 – Y2 – Y1       |
| 166 cm <sup>-1</sup>  | E              | Cl2 – Y2 – O1             |
| 154 cm <sup>-1</sup>  | E              | Cl1 – Y2                  |
| 140 cm <sup>-1</sup>  | A <sub>1</sub> | Cl2 – Cl1 – Y2 – Y1       |
| 84 cm <sup>-1</sup>   | E              | Y1 – Y2 – Cl1             |



**Supplementary Table S44:**  $\text{La}_2\text{OCl}_2\text{H}_2$  (R3m).  $\Gamma_{\text{optic}} = 6A_1 + 6E$ 

| Frequency             | Mode symmetry | Vibrational displacements |
|-----------------------|---------------|---------------------------|
| 1228 $\text{cm}^{-1}$ | $A_1$         | H2 – H1                   |
| 1073 $\text{cm}^{-1}$ | E             | H1 – H2                   |
| 684 $\text{cm}^{-1}$  | E             | H2 – H1 – O1              |
| 584 $\text{cm}^{-1}$  | $A_1$         | H1 – La2                  |
| 395 $\text{cm}^{-1}$  | $A_1$         | O1 – La1                  |
| 305 $\text{cm}^{-1}$  | E             | O1 – Cl2                  |
| 232 $\text{cm}^{-1}$  | $A_1$         | Cl1 – Cl2 – La1 – La2     |
| 211 $\text{cm}^{-1}$  | $A_1$         | Cl2 – Cl1 – La2           |
| 149 $\text{cm}^{-1}$  | E             | Cl2 – O1 – La1            |
| 134 $\text{cm}^{-1}$  | E             | Cl1 – La2                 |
| 113 $\text{cm}^{-1}$  | $A_1$         | La1 – La2 – Cl1           |
| 66 $\text{cm}^{-1}$   | E             | La1 – La2 – Cl1 – Cl2     |

**Supplementary Table S45:**  $\text{Gd}_2\text{OCl}_2\text{H}_2$  (R3m).  $\Gamma_{\text{optic}} = 6A_1 + 6E$ 

| Frequency             | Mode symmetry | Vibrational displacements |
|-----------------------|---------------|---------------------------|
| 1304 $\text{cm}^{-1}$ | $A_1$         | H2 – H1                   |
| 1189 $\text{cm}^{-1}$ | E             | H1 – H2                   |
| 738 $\text{cm}^{-1}$  | E             | H2 – H1 – O1              |
| 661 $\text{cm}^{-1}$  | $A_1$         | H1 – Gd2                  |
| 436 $\text{cm}^{-1}$  | $A_1$         | O1 – Gd1                  |
| 361 $\text{cm}^{-1}$  | E             | O1 – Gd2                  |
| 249 $\text{cm}^{-1}$  | $A_1$         | Cl1 – Cl2 – Gd1 – Gd2     |
| 230 $\text{cm}^{-1}$  | $A_1$         | Cl1 – Cl2 – Gd2           |
| 152 $\text{cm}^{-1}$  | E             | Cl2 – Gd1                 |
| 140 $\text{cm}^{-1}$  | E             | Cl1 – Gd2                 |
| 116 $\text{cm}^{-1}$  | $A_1$         | Gd1 – Gd2 – Cl1 – Cl2     |
| 68 $\text{cm}^{-1}$   | E             | Gd1 – Gd2 – Cl1 – Cl2     |

## 5. Simulation of X-ray diffraction patterns

The Cu K $\alpha$  monochromatic beam with wavelength  $\lambda=1.5406 \text{ \AA}$  was set as a parameter of calculation to determine the theoretical X-ray diffraction patterns. The illustrations have been made by using the VESTA program [4].

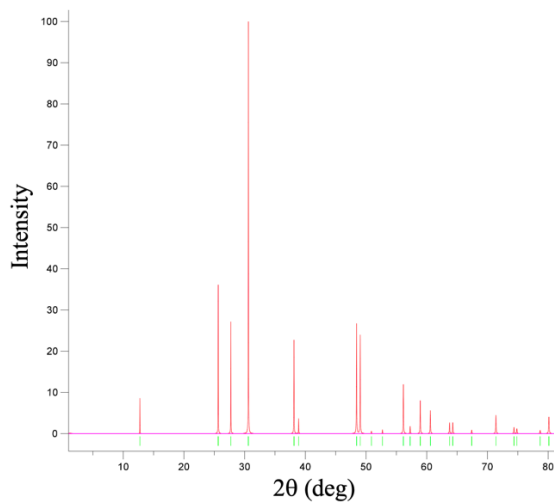

Supplementary Figure S3: Y<sub>2</sub>OFe<sub>2</sub>H<sub>2</sub> (P3m1)

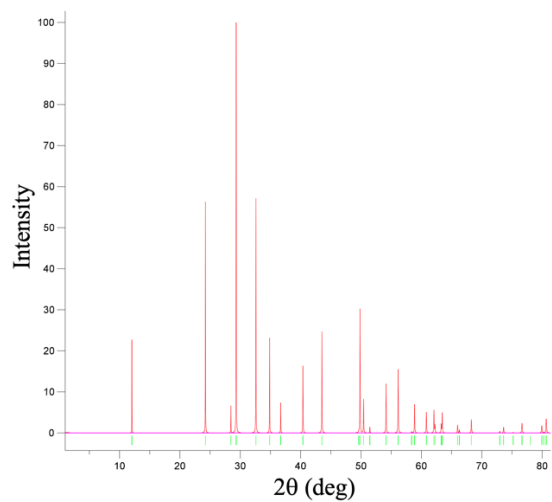

Supplementary Figure S4: Y<sub>2</sub>OFe<sub>2</sub>H<sub>2</sub> (R3m)

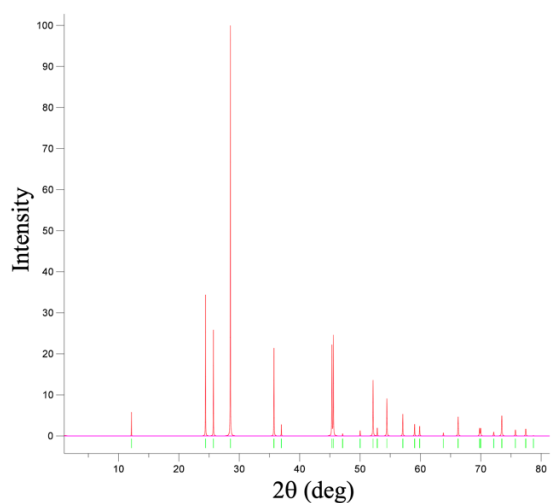

Supplementary Figure S5: La<sub>2</sub>OFe<sub>2</sub>H<sub>2</sub> (P3m1)

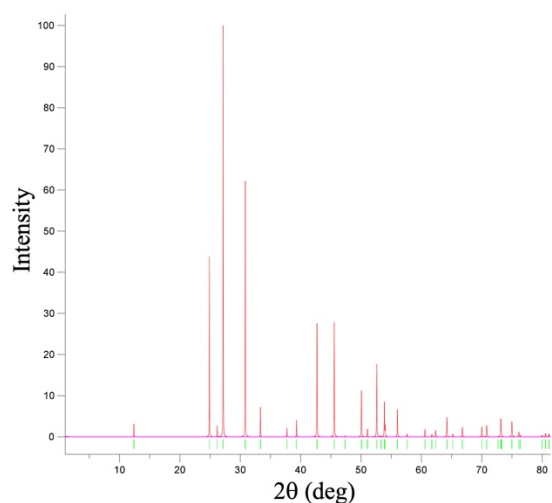

Supplementary Figure S6: La<sub>2</sub>OFe<sub>2</sub>H<sub>2</sub> (R3m)

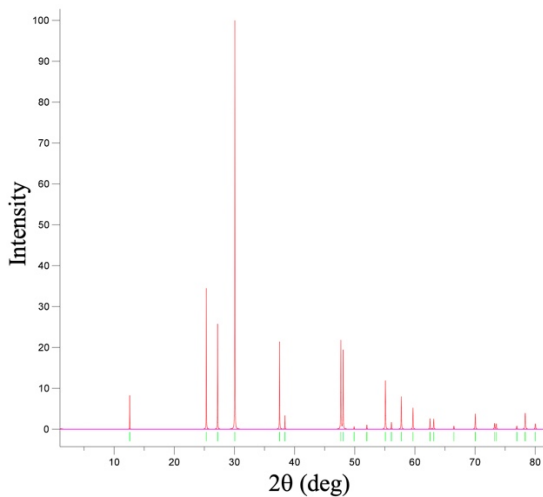

**Supplementary Figure S7: Gd<sub>2</sub>O<sub>2</sub>F<sub>2</sub>H<sub>2</sub> (P3m1)**

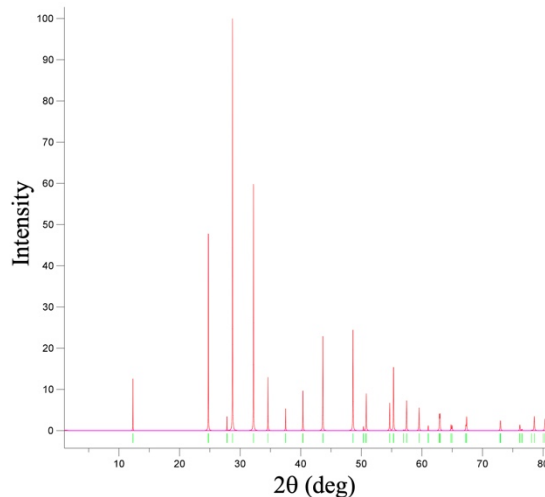

**Supplementary Figure S8: Gd<sub>2</sub>O<sub>2</sub>F<sub>2</sub>H<sub>2</sub> (R3m)**

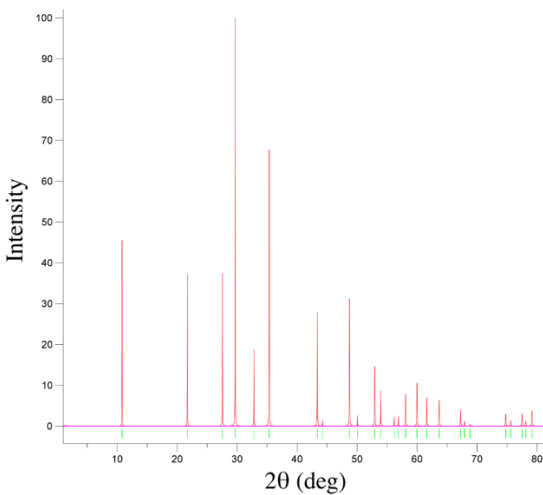

**Supplementary Figure S9: Y<sub>2</sub>OFCIH<sub>2</sub> (P3m1)**

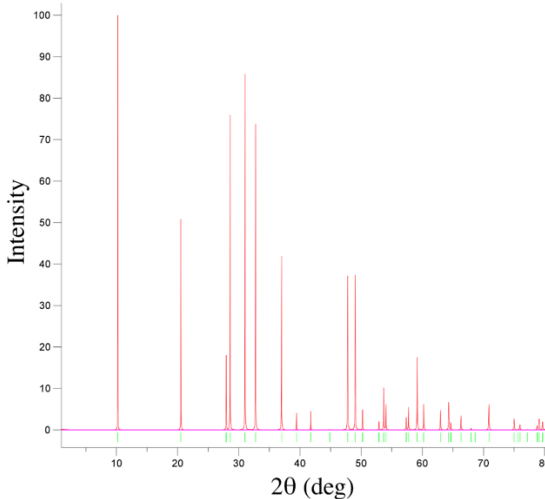

**Supplementary Figure S10: Y<sub>2</sub>OFCIH<sub>2</sub> (R3m)**

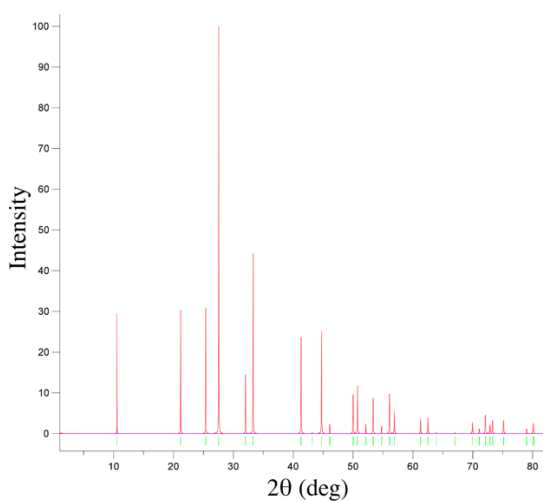

**Supplementary Figure S11: La<sub>2</sub>OFCIH<sub>2</sub> (P3m1)**

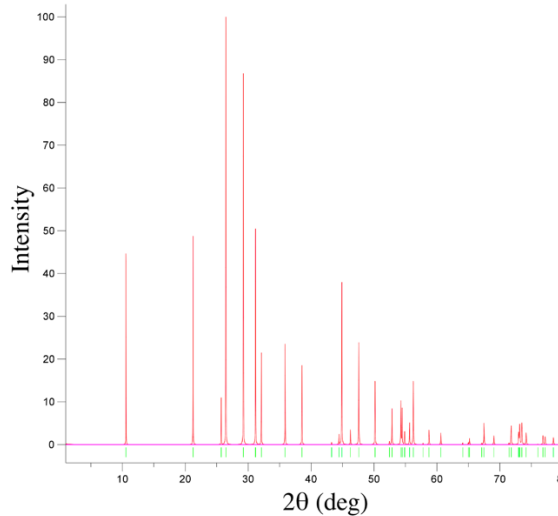

**Supplementary Figure S12: La<sub>2</sub>OFCIH<sub>2</sub> (R3m)**

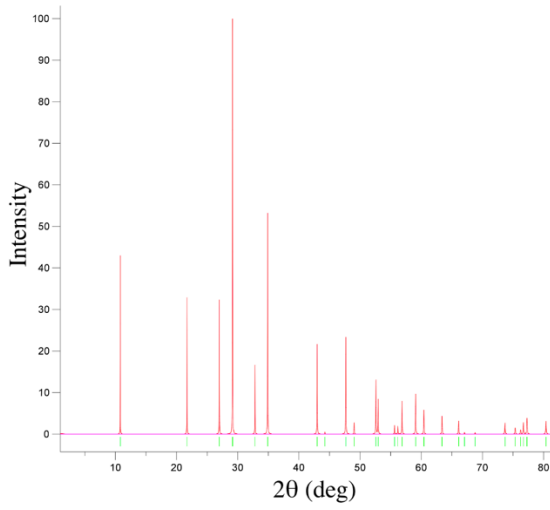

**Supplementary Figure S13:**  $Gd_2OFCIH_2$  (P3m1)

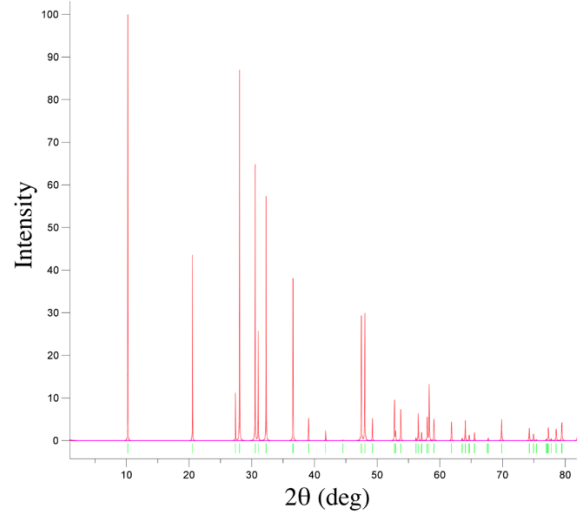

**Supplementary Figure S14:**  $Gd_2OFCIH_2$  (R3m)

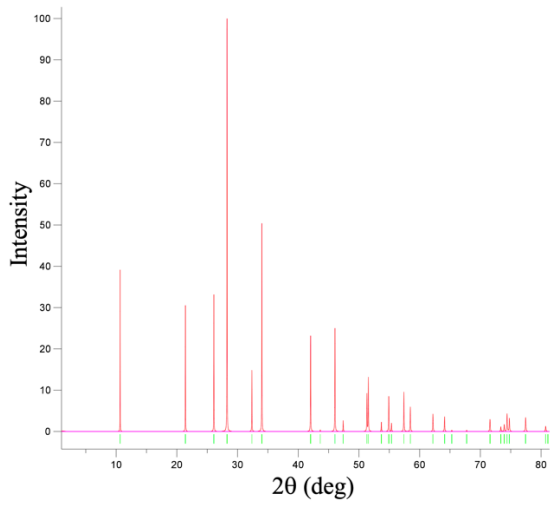

**Supplementary Figure S15:**  $LaGdOFCIH_2$  (P3m1)

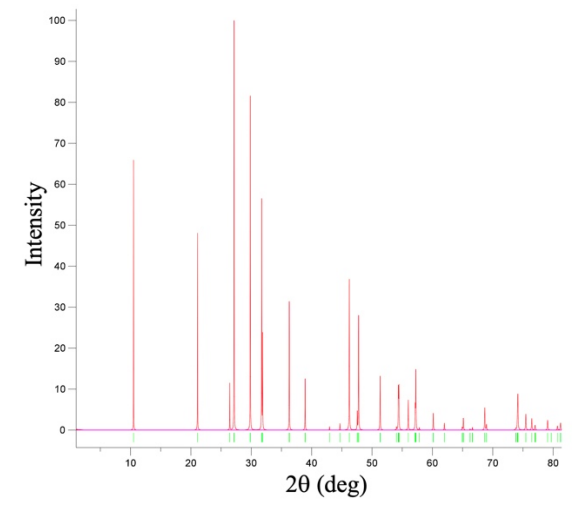

**Supplementary Figure S16:**  $LaGdOFCIH_2$  (R3m)

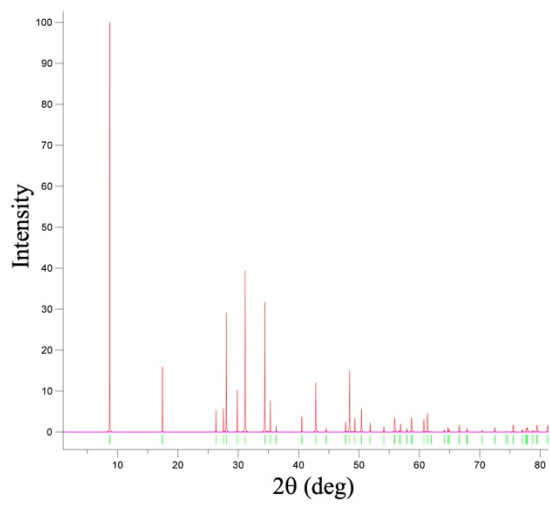

**Supplementary Figure S17:**  $Y_2OCl_2H_2$  (R3m)

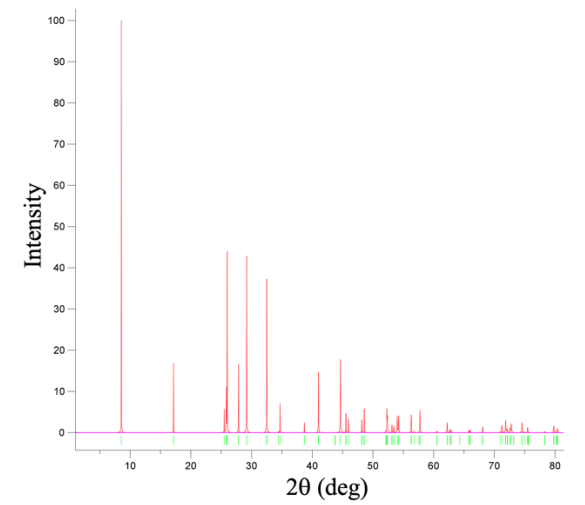

**Supplementary Figure S18:**  $La_2OCl_2H_2$  (R3m)

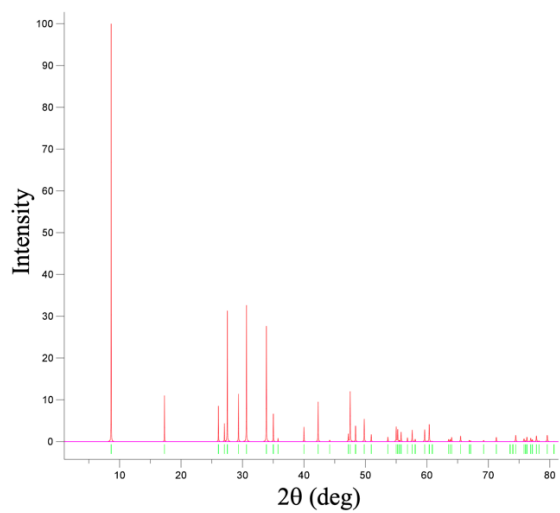

**Supplementary Figure S19:**  $\text{Gd}_2\text{OCl}_2\text{H}_2$  (R3m)

## 6. Radial distribution function evaluated for the shortest interatomic distances

Calculations have been performed for four temperatures:  $T = 12$  K (results are shown in black), 100 K (shown in red), 200 K (shown in blue) and 300 K (shown in green).

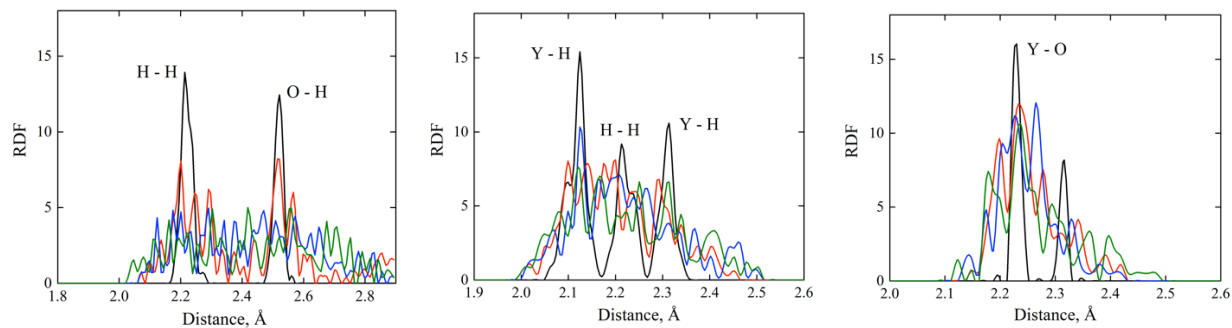

**Supplementary Figure S20:** Radial distribution functions for the shortest interatomic distances between atoms in  $\text{Y}_2\text{OF}_2\text{H}_2$  (R3m)

## 7. Piezoelectric properties of $\text{Ln}_2\text{OF}_{2-x}\text{Cl}_x\text{H}_2$ ( $\text{Ln} = \text{Y, La, Gd}$ )

**Supplementary Table S46:** Independent components of electronic and ionic contributions to direct piezoelectric tensor ( $e_{ij}$ ) and dielectric tensor ( $\epsilon_{ij}$ ) in  $\text{Ln}_2\text{OF}_2\text{H}_2$

|                                              |        | e15   | e22   | e31   | e33   | $\epsilon_{11}$ | $\epsilon_{33}$ |
|----------------------------------------------|--------|-------|-------|-------|-------|-----------------|-----------------|
| $\text{Y}_2\text{OF}_2\text{H}_2$<br>(P3m1)  | Elect. | -0.03 | -0.03 | 0.08  | -0.28 | 4.67            | 3.38            |
|                                              | Ion.   | 0.92  | 0.89  | 1.15  | -0.06 | 13.21           | 10.09           |
| $\text{Y}_2\text{OF}_2\text{H}_2$<br>(R3m)   | Elect. | -0.04 | 0.10  | 0.002 | 0.04  | 4.47            | 3.13            |
|                                              | Ion.   | -0.06 | -0.82 | 0.22  | -0.08 | 11.86           | 5.04            |
| $\text{La}_2\text{OF}_2\text{H}_2$<br>(P3m1) | Elect. | -0.01 | 0.03  | 0.11  | -0.34 | 4.48            | 3.44            |
|                                              | Ion.   | 0.60  | -0.41 | 1.02  | 0.44  | 12.86           | 8.71            |
| $\text{La}_2\text{OF}_2\text{H}_2$<br>(R3m)  | Elect. | -0.02 | 0.07  | -0.02 | 0.08  | 4.56            | 3.61            |
|                                              | Ion.   | -0.09 | -0.08 | 0.38  | -0.62 | 13.91           | 10.96           |

**Supplementary Table S47:** Independent components of electronic and ionic contributions to direct piezoelectric tensor ( $e_{ij}$ ) and dielectric tensor ( $\epsilon_{ij}$ ) in  $\text{Ln}_2\text{OFCIH}_2$

|                                       |        | e15   | e22   | e31   | e33   | $\epsilon_{11}$ | $\epsilon_{33}$ |
|---------------------------------------|--------|-------|-------|-------|-------|-----------------|-----------------|
| $\text{Y}_2\text{OFCIH}_2$<br>(P3m1)  | Elect. | 0.01  | 0.002 | 0.07  | -0.34 | 4.74            | 3.68            |
|                                       | Ion.   | -0.03 | 0.25  | 0.23  | -1.06 | 9.35            | 5.05            |
| $\text{Y}_2\text{OFCIH}_2$<br>(R3m)   | Elect. | -0.01 | 0.03  | 0.02  | -0.22 | 4.46            | 3.78            |
|                                       | Ion.   | -0.14 | -0.36 | 0.09  | -0.43 | 9.26            | 2.44            |
| $\text{La}_2\text{OFCIH}_2$<br>(P3m1) | Elect. | 0.04  | 0.01  | 0.10  | -0.35 | 4.50            | 3.75            |
|                                       | Ion.   | -0.05 | -0.05 | 0.37  | -0.54 | 10.13           | 5.74            |
| $\text{La}_2\text{OFCIH}_2$<br>(R3m)  | Elect. | 0.01  | 0.04  | 0.02  | -0.21 | 4.55            | 3.65            |
|                                       | Ion.   | -0.23 | 0.14  | 0.26  | -0.89 | 10.69           | 5.39            |
| $\text{Gd}_2\text{OFCIH}_2$<br>(P3m1) | Elect. | 0.02  | -0.01 | 0.08  | -0.37 | 4.70            | 3.80            |
|                                       | Ion.   | -0.03 | 0.16  | 0.30  | -0.99 | 10.10           | 5.49            |
| $\text{Gd}_2\text{OFCIH}_2$<br>(R3m)  | Elect. | 0.01  | 0.05  | 0.01  | -0.20 | 4.62            | 3.34            |
|                                       | Ion.   | -0.17 | -0.24 | 0.12  | -0.48 | 9.02            | 2.69            |
| $\text{LaGdOFCIH}_2$<br>(P3m1)        | Elect. | 0.06  | 0.003 | 0.05  | -0.36 | 4.67            | 3.80            |
|                                       | Ion.   | -0.05 | 0.20  | 0.36  | -0.75 | 12.71           | 5.65            |
| $\text{LaGdOFCIH}_2$<br>(R3m)         | Elect. | 0.04  | 0.04  | -0.02 | -0.22 | 4.62            | 3.95            |
|                                       | Ion.   | -0.22 | -0.18 | 0.23  | -0.82 | 12.51           | 4.31            |

**Supplementary Table S48:** Independent components of electronic and ionic contributions to direct piezoelectric tensor ( $e_{ij}$ ) and dielectric tensor ( $\epsilon_{ij}$ ) in  $\text{Ln}_2\text{OCl}_2\text{H}_2$

|                                              |        | e15    | e22   | e31  | e33   | $\epsilon_{11}$ | $\epsilon_{33}$ |
|----------------------------------------------|--------|--------|-------|------|-------|-----------------|-----------------|
| $\text{Y}_2\text{OCl}_2\text{H}_2$<br>(R3m)  | Elect. | -0.02  | 0.004 | 0.02 | -0.06 | 4.40            | 3.69            |
|                                              | Ion.   | -0.01  | -0.27 | 0.02 | -0.04 | 8.05            | 0.96            |
| $\text{La}_2\text{OCl}_2\text{H}_2$<br>(R3m) | Elect. | 0.01   | 0.01  | 0.03 | -0.04 | 4.25            | 3.40            |
|                                              | Ion.   | -0.06  | -0.10 | 0.06 | -0.03 | 8.39            | 1.14            |
| $\text{Gd}_2\text{OCl}_2\text{H}_2$<br>(R3m) | Elect. | -0.002 | 0.02  | 0.03 | -0.04 | 4.42            | 3.65            |
|                                              | Ion.   | -0.02  | -0.22 | 0.02 | -0.04 | 7.89            | 0.95            |

**Supplementary Table S49:** Comparison of the electromechanical properties of  $\text{Ln}_2\text{OF}_{2-x}\text{Cl}_x\text{H}_2$  expressed in terms of piezoelectric voltage constant  $g_{ij}$  ( $10^{-3} \times [\text{Vm/N}]$ ), piezoelectric coupling factors  $k_{ij}$  and  $k_t$ , and piezoelectric transduction coefficients  $d_{ij} \cdot g_{ij}$  ( $10^{-15} \times [\text{m}^2/\text{N}]$ )

| Chem. Formula                       | Structure | $g_{33}$ | $k_{33}$ | $k_t$ | $d_{33} \cdot g_{33}$ | $g_{31}$ | $k_{31}$ | $d_{31} \cdot g_{31}$ | $g_{15}$ | $k_{15}$ | $d_{15} \cdot g_{15}$ |
|-------------------------------------|-----------|----------|----------|-------|-----------------------|----------|----------|-----------------------|----------|----------|-----------------------|
| $\text{Y}_2\text{OF}_2\text{H}_2$   | P3m1      | -64.8    | 23.9%    | 8.4%  | 500                   | 58.3     | 23.2%    | 405                   | 271      | 53.1%    | 11576                 |
|                                     | R3m       | -64.2    | 7.3%     | 3.1%  | 298                   | 18.0     | 5.9%     | 23                    | 9.3      | 1.9%     | 12                    |
| $\text{La}_2\text{OF}_2\text{H}_2$  | P3m1      | -22.7    | 7.7%     | 2.8%  | 55                    | 57.8     | 21.2%    | 360                   | 210.7    | 37.2%    | 6811                  |
|                                     | R3m       | -91.3    | 24.6%    | 17.6% | 1074                  | 27.1     | 10.7%    | 95                    | -22.1    | 4.9%     | 80                    |
| $\text{Y}_2\text{OFCIH}_2$          | P3m1      | -600.0   | 94.4%    | 61.7% | 27841                 | 106.8    | 35.0%    | 882                   | -14.8    | 2.6%     | 27                    |
|                                     | R3m       | -723.3   | 69.3%    | 55.5% | 26205                 | 45.7     | 12.2%    | 105                   | -177     | 14.6%    | 3663                  |
| $\text{La}_2\text{OFCIH}_2$         | P3m1      | -179.8   | 43.6%    | 33.3% | 2719                  | 60.4     | 18.8%    | 307                   | -0.9     | 0.1%     | 0.1                   |
|                                     | R3m       | -637.7   | 86.0%    | 58.9% | 33367                 | 93.6     | 28.2%    | 719                   | -143.6   | 19.4%    | 2809                  |
| $\text{Gd}_2\text{OFCIH}_2$         | P3m1      | -427.5   | 79.5%    | 54.6% | 15028                 | 92.1     | 30.4%    | 697                   | -6.2     | 1.1%     | 5                     |
|                                     | R3m       | -770.9   | 73.7%    | 56.9% | 31715                 | 60.2     | 16.1%    | 193                   | -221.1   | 18.8%    | 5897                  |
| $\text{LaGdOFCIH}_2$                | P3m1      | -238.0   | 54.4%    | 41.4% | 4749                  | 64.0     | 20.3%    | 342                   | -0.2     | 0.1%     | 0.1                   |
|                                     | R3m       | -724.3   | 88.9%    | 60.9% | 38354                 | 94.4     | 27.6%    | 651                   | -91.0    | 12.3%    | 1256                  |
| $\text{Y}_2\text{OCl}_2\text{H}_2$  | R3m       | -290.4   | 16.2%    | 15.7% | 2999                  | 10.4     | 2.1%     | 3.8                   | 303.7    | 11.7%    | 9412                  |
| $\text{La}_2\text{OCl}_2\text{H}_2$ | R3m       | -249.6   | 13.8%    | 12.8% | 2504                  | 22.9     | 4.3%     | 21                    | -273.7   | 10.9%    | 8386                  |
| $\text{Gd}_2\text{OCl}_2\text{H}_2$ | R3m       | -260.6   | 14.5%    | 14.0% | 2765                  | 12.0     | 2.5%     | 6                     | -196.1   | 6.4%     | 4188                  |

**Supplementary Table S50:** Comparison of the relaxed lattice geometry within the PBE+U approximation and the relevant experimental data for rare-earth oxides, fluorides, chlorides and hydrides

|                   | $\text{La}_2\text{O}_3$ , P-3m1 |         | $\text{LaH}_3$ , Fm-3m |          | $\text{LaF}_3$ , P-3c1 |          | $\text{LaCl}_3$ , P63/m |         |
|-------------------|---------------------------------|---------|------------------------|----------|------------------------|----------|-------------------------|---------|
|                   | PBE+U                           | exp.[5] | PBE+U                  | exp.[6]  | PBE+U                  | exp.[7]  | PBE+U                   | exp.[8] |
| a, Å              | 3.96                            | 3.96    | 5.59                   | 5.62     | 7.15                   | 7.19     | 7.45                    | 7.48    |
| b, Å              | 3.96                            | 3.96    | 5.59                   | 5.62     | 7.15                   | 7.19     | 7.45                    | 7.48    |
| c, Å              | 6.21                            | 6.14    | 5.59                   | 5.62     | 7.33                   | 7.35     | 4.33                    | 4.37    |
| V, Å <sup>3</sup> | 84.17                           | 83.24   | 174.7                  | 177.5    | 324.3                  | 328.6    | 208.4                   | 211.2   |
|                   | $\text{Gd}_2\text{O}_3$ , Ia-3  |         | $\text{GdH}_3$ , P-3c1 |          | $\text{GdF}_3$ , Pnma  |          | $\text{GdCl}_3$ , P63/m |         |
|                   | PBE+U                           | exp.[9] | PBE+U                  | exp.[10] | PBE+U                  | exp.[11] | PBE+U                   | exp.[8] |
| a, Å              | 10.85                           | 10.79   | 6.44                   | 6.47     | 6.55                   | 6.57     | 7.32                    | 7.37    |
| b, Å              | 10.85                           | 10.79   | 6.44                   | 6.47     | 7.05                   | 6.98     | 7.32                    | 7.37    |
| c, Å              | 10.85                           | 10.79   | 6.70                   | 6.72     | 4.48                   | 4.39     | 4.05                    | 4.11    |
| V, Å <sup>3</sup> | 1276.7                          | 1256.2  | 241.0                  | 243.2    | 207.6                  | 201.3    | 188.3                   | 193.0   |



## References:

1. R. Gaillac, P. Pullumbi, F.X. Coudert. *J. Phys.: Condens. Matter.* 2016, 28, 27.
2. R. Gaillac, F.X. Coudert, <http://progs.coudert.name/elate>
3. Kroumova, E.; Aroyo, M. I.; Perez-Mato, J. M.; Kirov, A.; Capillas, C.; Ivantchev, S.; Wondratschek, H. Bilbao Crystallographic Server I: Databases and crystallographic computing programs. *Phase Transitions* **2003**, 76, 155–170.
4. Momma, K.; Izumi, F. VESTA 3 for three-dimensional visualization of crystal, volumetric and morphology data. *J. Appl. Crystallogr.* **2011**, 44, 1272-1276
5. Cao Wang, Ming-qiu Tan, Chun-mu Feng, Zhi-feng Ma, Shuai Jiang, Zhu-an Xu, Guanghan Cao, Kazuyuki Matsubayashi, and Yoshiya Uwatoko. La<sub>2</sub>Co<sub>2</sub>Se<sub>2</sub>O<sub>3</sub>: A Quasi-Two-Dimensional Mott Insulator with Unusual Cobalt Spin State and Possible Orbital Ordering, *J. Am. Chem. Soc.*, **2010**, 132 (20), 7069-7073
6. H. Meng, M.A. Kuzovnikov, M. Tkacz, Phase stability of some rare earth trihydrides under high pressure, *Int. J. Hydrogen Energy*, **2017**, 42, 29344-29349
7. Cheetham, A. K., Fender, B. E. F., Fuess, H. & Wright, A. F. A powder neutron diffraction study of lanthanum and cerium trifluorides, *Acta Cryst.*, **1976**, B32, 94-97
8. B. Morosin. Crystal Structures of Anhydrous Rare-Earth Chlorides, *J. Chem. Phys.*, **1968**, 49, 3007-3012
9. Bartos, A., Lieb, K. P., Uhrmacher, M. & Wiarda, D. Refinement of atomic positions in bixbyite oxides using perturbed angular correlation spectroscopy, *Acta Cryst.* **1993**, B49, 165-169.
10. M. Ellner, H. Reule, E.J. Mittemeijer, The structure of the trihydride GdH<sub>3</sub>, *J. Alloys Compd.*, **2000**, 309, 1–2, 127-131
11. I.M. Ranieri, S.L. Baldochi, D. Klimm, The phase diagram GdF<sub>3</sub>–LuF<sub>3</sub>, *J. Solid State Chem.*, **2008**, 181, 5, 1070-1074
